# Supplementary material for: Bromide-mediated, C2-selective, and oxygenative alkylation of pyridinium salts using alkenes and molecular oxygen
Source: Royal Society of Chemistry journal article supplement (doi:10.1039/d2cc06138d), 2023-01-01
Supplement: d2cc06138d1.pdf [file d2cc06138d1.pdf]

## Supporting Information

### **Bromide-Mediated, C2-Selective, and Oxygenative Alkylation of Pyridinium Salts using Alkenes and Molecular Oxygen†**

Dong Qiu,<sup>a,b</sup> Huiyang Liu,<sup>a,b</sup> Shuai Sun,<sup>a</sup> Hongyan Ni,<sup>a,b</sup> and Yijin Su<sup>\*a</sup>

<sup>a</sup> *State Key Laboratory for Oxo Synthesis and Selective Oxidation, Lanzhou Institute of Chemical Physics (LICP), Chinese Academy of Sciences, Lanzhou 730000 (China)*

*E-mail: suyj@licp.cas.cn*

<sup>b</sup> *University of Chinese Academy of Sciences, Beijing 100049 (China)*

## Table of Contents

|                                                        |    |
|--------------------------------------------------------|----|
| 1. General Procedures .....                            | 3  |
| 2. Synthesis of Pyridinium Salts and Spectra Data..... | 3  |
| 1a-HBF <sub>4</sub> : .....                            | 3  |
| 1a-HPF <sub>6</sub> :.....                             | 5  |
| 1a-HSbF <sub>6</sub> :.....                            | 7  |
| 1b-HPF <sub>6</sub> : .....                            | 9  |
| 1e-HPF <sub>6</sub> :.....                             | 12 |
| 1f-HBr:.....                                           | 14 |
| 1f-HPF <sub>6</sub> :.....                             | 15 |
| 1h-HBr:.....                                           | 18 |
| 1h-HPF <sub>6</sub> :.....                             | 19 |
| 1i-HBr:.....                                           | 22 |
| 1j-HPF <sub>6</sub> :.....                             | 23 |
| 1k-HCl:.....                                           | 26 |
| 1l-HBr:.....                                           | 27 |
| 1m-HBr:.....                                           | 29 |
| 1n-HBr:.....                                           | 30 |
| 1o-HBr:.....                                           | 31 |
| 1p-HBr:.....                                           | 33 |
| 3. Synthesis of Products and Spectra Data .....        | 34 |
| 3aa:.....                                              | 34 |
| 3ba:.....                                              | 36 |
| 3ca:.....                                              | 37 |
| 3da:.....                                              | 39 |
| 3ea:.....                                              | 40 |
| 3fa:.....                                              | 42 |
| 3ga:.....                                              | 43 |
| 3ha:.....                                              | 45 |
| 3ia:.....                                              | 46 |
| 3ja:.....                                              | 48 |
| 3ka:.....                                              | 49 |
| 3la:.....                                              | 51 |
| 3ma:.....                                              | 53 |
| 3bb:.....                                              | 54 |
| 3bc:.....                                              | 55 |
| 3bd:.....                                              | 57 |
| 3be:.....                                              | 58 |
| 3bf:.....                                              | 60 |
| 3bg:.....                                              | 61 |
| 3bh:.....                                              | 63 |
| 3fi:.....                                              | 64 |
| 3aj:.....                                              | 66 |
| Other products : .....                                 | 68 |
| 3oa:.....                                              | 68 |
| 3pa:.....                                              | 70 |
| 4. Mechanism Study .....                               | 71 |
| Synthesis of 4ja:.....                                 | 71 |
| 4ja to 3ja:.....                                       | 73 |
| 5. X-ray Information for 3ja and 4ja.....              | 74 |
| 6. Reference .....                                     | 79 |

## 1. General Procedures

All the commercial available reagents and solvents were used as received. NMR spectra were obtained with Avance TM III 400MHz instruments, the chemical shifts were quoted on the  $\delta$ -scale in ppm. Multiplicities are reported as follows: singlet (s), doublet (d), triplet(t), doublet of doublets (dd), doublet of doublet of doublets (ddd), doublet of triplets (dt), doublet of quartets (dq), triplet of doublets (td), quartet (q), quartet of doublets (qd), and multiplet (m). Coupling constants (J) are reported in Hz. High resolution mass spectra(HRMS) were measured at a Bruker micrOTOF-QII instruments.

## 2. Synthesis of Pyridinium Salts and Spectra Data

The starting materials of pyridinium salts are listed below. **1a-HBr**,<sup>1</sup> **1b-HBr**,<sup>2</sup> **1c-HBr**,<sup>3</sup> **1d-HBr**,<sup>4</sup> **1f-HBr**,<sup>5</sup> **1g-HBr**<sup>6</sup> and **1j-HBr**<sup>7</sup> were prepared following reported procedures.



### 1a-HBF<sub>4</sub>:

#### 1-(2-oxo-2-phenylethyl)pyridin-1-ium tetrafluoroborate



### 1a-HBF<sub>4</sub>

The procedure for synthesis of compound **1a-HBF<sub>4</sub>**: A solution of 1-(2-oxo-2-phenylethyl)pyridin-1-ium bromide **1a-HBr** 1.39g, 5mmol in H<sub>2</sub>O (5mL) was added dropwise under stirring to a solution of NaBF<sub>4</sub> (1.1g, 10mmol) in H<sub>2</sub>O (5mL). The mixture was stirred at r.t. for 30min until the precipitate was completely formed. Then the insoluble solid were removed by filtration and washed with water to give pure products **1a-HBF<sub>4</sub>** as white powder (928mg, yield=69%).

<sup>1</sup>H NMR (400 MHz, DMSO-*d*<sub>6</sub>):  $\delta$  8.98 (d, *J* = 5.1 Hz, 2H), 8.78 – 8.67 (m, 1H), 8.28 (dd, *J* = 7.8, 6.4 Hz, 2H), 8.14 – 8.00 (m, 2H), 7.85 – 7.75 (m, 1H), 7.68 (t, *J* = 7.7 Hz, 2H), 6.46 (s, 2H).

<sup>13</sup>C NMR (101 MHz, DMSO-*d*<sub>6</sub>):  $\delta$  190.7, 146.4, 146.3, 134.8, 133.5, 129.2, 128.3, 127.9, 66.3.

<sup>19</sup>F NMR (376 MHz, DMSO):  $\delta$  -148.20.

<sup>1</sup>H, <sup>13</sup>C, <sup>19</sup>F NMR Spectra of **1a-HBF<sub>4</sub>**:





#### 1a-HPF<sub>6</sub>:

#### 1-(2-oxo-2-phenylethyl)pyridin-1-ium hexafluorophosphate



#### 1a-HPF<sub>6</sub>

The procedure for synthesis of compound **1a-HPF<sub>6</sub>**: A solution of 1-(2-oxo-2-phenylethyl)pyridin-1-ium bromide **1a-HBr** (1.39g, 5mmol) in H<sub>2</sub>O (5mL) was added dropwise under stirring to a solution of NH<sub>4</sub>PF<sub>6</sub> (1.63g, 10mmol) in H<sub>2</sub>O (5mL). The mixture was stirred at r.t. for 30min until the precipitate was completely formed. Then the insoluble solid were removed by filtration and washed with water to give pure products **1a-HPF<sub>6</sub>** as white powder (1.58g, yield=92%).

<sup>1</sup>H NMR (400 MHz, DMSO-*d*<sub>6</sub>): δ 8.98 (d, *J* = 6.0 Hz, 2H), 8.74 (t, *J* = 7.8 Hz, 1H), 8.28 (t, *J* = 6.9 Hz, 2H), 8.07 (d, *J* = 7.7 Hz, 2H), 7.81 (t, *J* = 7.4 Hz, 1H), 7.68 (t, *J* = 7.6 Hz, 2H), 6.46 (s, 2H).

<sup>13</sup>C NMR (101 MHz, DMSO-*d*<sub>6</sub>): δ 190.7, 146.3, 134.8, 133.5, 129.2, 128.2, 127.9, 66.3.

<sup>19</sup>F NMR (376 MHz, DMSO): δ -69.2, -71.0.

<sup>31</sup>P NMR (162 MHz, DMSO): δ -130.98, -135.37, -139.76, -144.15, -148.55, -152.94, -157.33.

<sup>1</sup>H, <sup>13</sup>C, <sup>19</sup>F, <sup>31</sup>P NMR Spectra of **1a-HPF<sub>6</sub>**:





**1a-HSbF<sub>6</sub>:**  
**1-(2-oxo-2-phenylethyl)pyridin-1-ium hexafluoroantimonate**



The procedure for synthesis of compound **1a-HSbF<sub>6</sub>**: A solution of 1-(2-oxo-2-phenylethyl)pyridin-1-ium bromide **1a-HBr** (1.39g, 5mmol) in H<sub>2</sub>O (5mL) was added dropwise under stirring to a solution of NaSbF<sub>6</sub> (2.59g, 10mmol) in H<sub>2</sub>O (5mL). The mixture was stirred at r.t. for 30min until the precipitate was completely formed. Then the insoluble solid were removed by filtration and washed with water to give pure products **1a-HSbF<sub>6</sub>** as white powder (1.67g, yield=77%).

<sup>1</sup>H NMR (400 MHz, DMSO-*d*<sub>6</sub>): δ 9.06 – 8.93 (m, 2H), 8.79 – 8.66 (m, 1H), 8.28 (dd, *J* = 7.7, 6.3 Hz, 2H), 8.08 (d, *J* = 7.0 Hz, 2H), 7.81 (t, *J* = 7.3 Hz, 1H), 7.68 (t, *J* = 7.7 Hz, 2H), 6.46 (s, 2H).

<sup>13</sup>C NMR (101 MHz, DMSO): δ 186.7, 142.3, 130.8, 129.5, 125.2, 124.3, 123.8, 62.3.

<sup>19</sup>F NMR (376 MHz, DMSO): δ -105.62-δ-133.83, m.

<sup>1</sup>H, <sup>13</sup>C, <sup>19</sup>F NMR Spectra of **1a-HSbF<sub>6</sub>**:







**1b-HPF<sub>6</sub>:**  
4-(methoxycarbonyl)-1-(2-oxo-2-phenylethyl)pyridin-1-ium hexafluorophosphate



The procedure for synthesis of compound **1b-HPF<sub>6</sub>**: A solution of 4-(methoxycarbonyl)-1-(2-oxo-2-phenylethyl)pyridin-1-ium bromide **1b-HBr** (1.68g, 5mmol) in H<sub>2</sub>O (5mL) was added dropwise under stirring to a solution of NH<sub>4</sub>PF<sub>6</sub> (1.63g, 10mmol) in H<sub>2</sub>O (5mL). The mixture was stirred at r.t. for 30min until the precipitate was completely formed. Then the insoluble solid were removed by filtration and washed with water to give pure products **1b-HPF<sub>6</sub>** as colorless powder (1.64g, yield=82%).

<sup>1</sup>H NMR (400 MHz, DMSO-*d*<sub>6</sub>): δ 9.17 (d, *J* = 6.8 Hz, 2H), 8.66 (d, *J* = 6.8 Hz, 2H), 8.12 – 8.03 (m, 2H), 7.86 – 7.76 (m, 1H), 7.68 (t, *J* = 7.7 Hz, 2H), 6.55 (s, 2H), 4.02 (s, 3H).

<sup>13</sup>C NMR (101 MHz, DMSO): δ 190.3, 162.5, 147.8, 144.5, 134.8, 133.5, 129.2, 128.3, 127.0, 66.7, 53.8.

<sup>19</sup>F NMR (376 MHz, DMSO): δ -69.19, -71.08.

<sup>31</sup>P NMR (162 MHz, DMSO): δ -131.03, -135.42, -139.82, -144.21, -148.60, -152.99, -157.38.

<sup>1</sup>H, <sup>13</sup>C, <sup>19</sup>F, <sup>31</sup>P NMR Spectra of **1b-HPF<sub>6</sub>**:







**1e-HPF<sub>6</sub>:**

**4-(methoxycarbonyl)-1-(2-oxopropyl)pyridin-1-ium hexafluorophosphate**



**1e-HPF<sub>6</sub>**

The procedure for synthesis of compound **1e-HPF<sub>6</sub>**: A solution of 4-(methoxycarbonyl)-1-(2-oxopropyl)pyridin-1-ium chloride **1e-HCl** (1.15g, 5mmol) in H<sub>2</sub>O (5mL) was added dropwise under stirring to a solution of NH<sub>4</sub>PF<sub>6</sub> (1.63g, 10mmol) in H<sub>2</sub>O (5mL). The mixture was stirred at r.t. for 30min until the precipitate was completely formed. Then the insoluble solid were removed by filtration and washed with water to give pure products **1e-HPF<sub>6</sub>** as white powder (1.16g, yield=68%).

<sup>1</sup>H NMR (400 MHz, DMSO-*d*<sub>6</sub>): δ 9.00 (d, *J* = 6.8 Hz, 2H), 8.60 (d, *J* = 6.8 Hz, 2H), 5.82 (s, 2H), 4.00 (s, 3H), 2.33 (s, 3H).

<sup>13</sup>C NMR (101 MHz, DMSO): δ 198.9, 162.5, 147.4, 144.4, 126.9, 68.7, 53.8, 27.1.

<sup>19</sup>F NMR (376 MHz, DMSO): δ -69.22, -71.11.

<sup>31</sup>P NMR (162 MHz, DMSO): δ -131.05, -135.44, -139.83, -144.22, -148.62, -153.01, -157.40.

<sup>1</sup>H, <sup>13</sup>C, <sup>19</sup>F, <sup>31</sup>P NMR Spectra of **1e-HPF<sub>6</sub>**:





**1f-HBr:**

**1-(2-ethoxy-2-oxoethyl)-4-(methoxycarbonyl)pyridin-1-ium bromide**



The procedure for synthesis of compound **1f-HBr**: Methyl isonicotinate (5.5mmol) and ethyl 2-bromoacetate (5mmol) were added in 3mL of ethyl acetate and stirred at room temperature for 4 hours. Then the resulting precipitate was filtered and washed with ethyl acetate to afford **1f-HBr**, as white solid (745mg, yield=49%).

$^1\text{H}$  NMR (400 MHz,  $\text{DMSO}-d_6$ ):  $\delta$  9.31 (d,  $J = 6.7$  Hz, 2H), 8.64 (d,  $J = 6.8$  Hz, 2H), 5.85 (s, 2H), 4.25 (q,  $J = 7.1$  Hz, 2H), 4.00 (s, 3H), 1.27 (t,  $J = 7.1$  Hz, 3H).

$^{13}\text{C}$  NMR (101 MHz,  $\text{DMSO}-d_6$ ):  $\delta$  166.0, 162.4, 147.8, 144.7, 126.9, 62.4, 60.7, 53.9, 13.9.

$^1\text{H}$ ,  $^{13}\text{C}$  NMR Spectra of **1f-HBr**:



**1f-HPF<sub>6</sub>**:

**1-(2-ethoxy-2-oxoethyl)-4-(methoxycarbonyl)pyridin-1-ium hexafluorophosphate**



The procedure for synthesis of compound **1f-HPF<sub>6</sub>**: A solution of 1-(2-ethoxy-2-oxoethyl)-4-(methoxycarbonyl)pyridin-1-ium bromide **1f-HBr** (1.52g, 5mmol) in H<sub>2</sub>O (5mL) was added dropwise under stirring to a solution of NH<sub>4</sub>PF<sub>6</sub> (1.63g, 10mmol) in H<sub>2</sub>O (5mL). The mixture was stirred at r.t. for 30min until the precipitate was completely formed. Then the insoluble solid were removed by filtration and washed with water to give pure products **1f-HPF<sub>6</sub>** as white powder (1.46g, yield=79%).

<sup>1</sup>H NMR (400 MHz, DMSO-*d*<sub>6</sub>): δ 9.22 (d, *J* = 6.8 Hz, 2H), 8.63 (d, *J* = 6.3 Hz, 2H), 5.74 (s, 2H), 4.25 (q, *J* = 7.1 Hz, 2H), 4.00 (s, 3H), 1.27 (t, *J* = 7.1 Hz, 3H).

<sup>13</sup>C NMR (101 MHz, DMSO-*d*<sub>6</sub>): δ 166.1, 162.4, 147.8, 144.9, 127.0, 62.5, 60.7, 53.8, 13.9.

<sup>19</sup>F NMR (376 MHz, DMSO): δ -69.28, -71.17.

<sup>31</sup>P NMR (162 MHz, DMSO): δ -131.06, -135.45, -139.84, -144.23, -148.62, -153.01, -157.41.

<sup>1</sup>H, <sup>13</sup>C, <sup>19</sup>F, <sup>31</sup>P NMR Spectra of **1f-HPF<sub>6</sub>**:









**1h-HBr:**

**4-(methoxycarbonyl)-1-(3-methylbut-2-en-1-yl)pyridin-1-ium bromide**



The procedure for synthesis of compound **1h-HBr**: Methyl isonicotinate (5.5mmol) and 3,3-Dimethylallyl bromide (5mmol) were added in 3mL of ethyl acetate and stirred at room temperature for 8 hours. Then the resulting precipitate was filtered and washed with ethyl acetate to afford **1h-HBr**, as white solid (959mg, yield=67%).

$^1\text{H}$  NMR (400 MHz,  $\text{DMSO-}d_6$ ):  $\delta$  9.22 (d,  $J = 6.8$  Hz, 2H), 8.50 (d,  $J = 6.3$  Hz, 2H), 5.57 – 5.51 (m, 1H), 5.37 (d,  $J = 7.4$  Hz, 2H), 3.99 (s, 3H), 1.83 (dd,  $J = 17.3, 1.3$  Hz, 6H).

$^{13}\text{C}$  NMR (101 MHz,  $\text{DMSO-}d_6$ ):  $\delta$  162.6, 146.0, 143.6, 143.0, 127.1, 116.6, 58.6, 53.8, 25.5, 18.4.

$^1\text{H}$ ,  $^{13}\text{C}$  NMR Spectra of **1h-HBr**:



**1h-HPF<sub>6</sub>:**  
**4-(methoxycarbonyl)-1-(3-methylbut-2-en-1-yl)pyridin-1-ium hexafluorophosphate**



The procedure for synthesis of compound **1h-HPF<sub>6</sub>**: A solution of 4-(methoxycarbonyl)-1-(3-methylbut-2-en-1-yl)pyridin-1-ium bromide **1h-HBr** (1.43g, 5mmol) in H<sub>2</sub>O (5mL) was added dropwise under stirring to a solution of NH<sub>4</sub>PF<sub>6</sub> (1.63g, 10mmol) in H<sub>2</sub>O (5mL). The mixture was stirred at r.t. for 30min until the precipitate was completely formed. Then the insoluble solid were removed by filtration and washed with water to give pure products **1h-HPF<sub>6</sub>** as white powder (1.25g, yield=71%).

<sup>1</sup>H NMR (400 MHz, DMSO-*d*<sub>6</sub>): δ 9.16 (d, *J* = 6.3 Hz, 2H), 8.49 (d, *J* = 6.1 Hz, 2H), 5.53 (s, 1H), 5.33 (d, *J* = 7.4 Hz, 2H), 3.99 (s, 3H), 1.83 (d, *J* = 13.8 Hz, 6H).

<sup>13</sup>C NMR (101 MHz, DMSO-*d*<sub>6</sub>): δ 162.5, 145.8, 143.8, 143.2, 127.2, 116.5, 58.7, 53.7, 25.4, 18.1.

<sup>19</sup>F NMR (376 MHz, DMSO): δ -69.30, -71.19.

<sup>31</sup>P NMR (162 MHz, DMSO): δ -131.06, -135.46, -139.85, -144.24, -148.63, -153.03, -157.42.

<sup>1</sup>H, <sup>13</sup>C, <sup>19</sup>F, <sup>31</sup>P NMR Spectra of **1h-HPF<sub>6</sub>**:







**1i-HBr:**

**1-(cyclopropylmethyl)-4-(methoxycarbonyl)pyridin-1-ium bromide**



**1i-HBr**

The procedure for synthesis of compound **1i-HBr**: Methyl isonicotinate (5.5mmol) and (Bromomethyl)cyclopropane (5mmol) were added in 3mL of ethyl acetate and stirred at 60°C for 12 hours. Then the resulting precipitate was filtered and washed with ethyl acetate to afford **1i-HBr**, as white solid (259mg, yield=19%).

$^1\text{H}$  NMR (400 MHz,  $\text{DMSO-}d_6$ ):  $\delta$  9.37 (d,  $J = 6.1$  Hz, 2H), 8.55 (d,  $J = 6.1$  Hz, 2H), 4.64 (d,  $J = 7.5$  Hz, 2H), 4.00 (s, 3H), 1.48 (tt,  $J = 7.7, 5.0$  Hz, 1H), 0.70 – 0.58 (m, 4H).

$^{13}\text{C}$  NMR (101 MHz,  $\text{DMSO-}d_6$ ):  $\delta$  162.6, 146.0, 143.8, 127.1, 64.8, 53.8, 12.1, 4.1.

$^1\text{H}$ ,  $^{13}\text{C}$  NMR Spectra of **1i-HBr**:



**1j-HPF<sub>6</sub>:**  
**2-(2-oxo-2-phenylethyl)isoquinolin-2-ium hexafluorophosphate**



The procedure for synthesis of compound **1j-HPF<sub>6</sub>**: A solution of 4-(methoxycarbonyl)-1-(2-oxo-2-phenylethyl)pyridin-1-ium bromide **1j-HBr** (1.64g, 5mmol) in H<sub>2</sub>O (5mL) was added dropwise under stirring to a solution of NH<sub>4</sub>PF<sub>6</sub> (1.63g, 10mmol) in H<sub>2</sub>O (5mL). The mixture was stirred at r.t. for 30min until the precipitate was completely formed. Then the insoluble solid were removed by filtration and washed with water to give pure products **1j-HPF<sub>6</sub>** as colorless powder (1.67g, yield=85%).

<sup>1</sup>H NMR (400 MHz, DMSO-*d*<sub>6</sub>): δ 9.99 (s, 1H), 8.80 – 8.64 (m, 2H), 8.57 (d, *J* = 8.3 Hz, 1H), 8.43 (d, *J* = 8.3 Hz, 1H), 8.35 (t, *J* = 7.6 Hz, 1H), 8.13 (dd, *J* = 6.2, 2.9 Hz, 3H), 7.83 (t, *J* = 7.4 Hz, 1H), 7.71 (t, *J* = 7.6 Hz, 2H), 6.61 (s, 2H).

<sup>13</sup>C NMR (101 MHz, DMSO-*d*<sub>6</sub>): δ 190.9, 151.7, 137.5, 137.2, 136.4, 134.8, 133.6, 131.4, 130.6, 129.2, 128.3, 127.4, 126.9, 125.5, 66.1.

<sup>19</sup>F NMR (377 MHz, DMSO): δ -69.13, -71.01.

<sup>31</sup>P NMR (162 MHz, DMSO): δ -131.00, -135.39, -139.79, -144.18, -148.57, -152.96, -157.35.

<sup>1</sup>H, <sup>13</sup>C, <sup>19</sup>F, <sup>31</sup>P NMR Spectra of **1j-HPF<sub>6</sub>**:









**1k-HCl:**

**1-(4-methoxybenzyl)-4-(methoxycarbonyl)pyridin-1-ium chloride**



**1k-HCl**

**General procedure:** The procedure for synthesis of compound **1k-HCl**: Methyl isonicotinate (5.5mmol) and 1-(chloromethyl)-4-methoxybenzene (5mmol) were added in 3mL of ethyl acetate and stirred at room temperature for 8 hours. Then the resulting precipitate was filtered and washed with ethyl acetate to afford **1k-HCl** as white solid.

<sup>1</sup>H NMR (400 MHz, Deuterium Oxide) δ 8.94 (d, *J* = 6.2 Hz, 2H), 8.34 (d, *J* = 6.1 Hz, 2H), 7.32 (d, *J* = 8.6 Hz, 2H), 6.86 (t, *J* = 9.9 Hz, 2H), 5.68 (s, 2H), 3.89 (s, 3H), 3.66 (s, 3H).

<sup>13</sup>C NMR (101 MHz, Deuterium Oxide) δ 163.6, 160.1, 145.3, 144.7, 131.2, 127.7, 124.4, 114.9, 64.6, 55.4, 54.1.

<sup>1</sup>H, <sup>13</sup>C NMR Spectra:



**11-HBr:**  
**4-(methoxycarbonyl)-1-(4-nitrobenzyl)pyridin-1-ium bromide**



**General procedure:** The procedure for synthesis of compound **11-HBr**: Methyl isonicotinate (5.5mmol) and 1-(bromomethyl)-4-nitrobenzene (5mmol) were added in 3mL of ethyl acetate and stirred at room temperature for 8 hours. Then the resulting precipitate was filtered and washed with ethyl acetate to afford **11-HBr** as white solid.

<sup>1</sup>H NMR (400 MHz, Deuterium Oxide): δ 9.12 – 9.01 (m, 2H), 8.50 – 8.40 (m, 2H), 8.16 – 8.07 (m, 2H), 7.60 – 7.50 (m, 2H), 5.95 (s, 2H), 3.92 (s, 3H).

<sup>13</sup>C NMR (101 MHz, Deuterium Oxide): δ 163.6, 148.3, 146.2, 145.4, 139.2, 130.1, 128.1, 127.6, 124.5, 63.8, 54.2.

<sup>1</sup>H, <sup>13</sup>C NMR Spectra:





**1m-HBr:**

**1-(but-2-yn-1-yl)-4-(methoxycarbonyl)pyridin-1-ium bromide**



**General procedure:** The procedure for synthesis of compound **1m-HBr**: Methyl isonicotinate (5.5mmol) and 1-bromobut-2-yne (5mmol) were added in 3mL of ethyl acetate and stirred at room temperature for 8 hours. Then the resulting precipitate was filtered and washed with ethyl acetate to afford **1m-HBr** as gray solid.

<sup>1</sup>H NMR (400 MHz, Deuterium Oxide):  $\delta$  9.19-9.04 (m, 2H), 8.45 (q,  $J$  = 6.6, 6.0 Hz, 2H), 5.51 – 5.40 (m, 2H), 4.00 – 3.81 (m, 3H), 1.84 (dt,  $J$  = 8.2, 2.7 Hz, 3H).

<sup>13</sup>C NMR (101 MHz, Deuterium Oxide):  $\delta$  163.7, 145.3, 145.1, 127.5, 89.9, 68.5, 54.1, 51.8, 2.9.

<sup>1</sup>H, <sup>13</sup>C NMR Spectra:



**1n-HBr:**  
**1-allyl-4-(methoxycarbonyl)pyridin-1-ium bromide**



**General procedure:** The procedure for synthesis of compound **1n-HBr**: Methyl isonicotinate (5.5mmol) and Allyl bromide (5mmol) were added in 3mL of ethyl acetate and stirred at room temperature for 8 hours. Then the resulting precipitate was filtered and washed with ethyl acetate to afford **1n-HBr**, as gray solid (1.032g, yield=80%).

$^1\text{H}$  NMR (400 MHz, DMSO- $d_6$ ):  $\delta$  9.27 (d,  $J$  = 6.9 Hz, 2H), 8.55 (d,  $J$  = 6.8 Hz, 2H), 6.19 (dd,  $J$  = 16.9, 10.4 Hz, 1H), 5.51 – 5.39 (m, 4H), 4.00 (s, 3H).

$^{13}\text{C}$  NMR (101 MHz, DMSO- $d_6$ ):  $\delta$  162.5, 146.3, 143.8, 131.4, 127.2, 122.4, 62.5, 53.8.

$^1\text{H}$ ,  $^{13}\text{C}$  NMR Spectra:



**1o-HBr:**  
**4-(methoxycarbonyl)-1-(2-methylallyl)pyridin-1-ium bromide**



**1o-HBr**

**General procedure:** The procedure for synthesis of compound **1o-HBr**: Methyl isonicotinate (5.5mmol) and 3-bromo-2-methylprop-1-ene (5mmol) were added in 3mL of ethyl acetate and stirred at room temperature for 10 hours. Then the resulting precipitate was filtered and washed with ethyl acetate to afford **1o-HBr**, as white solid (925.3mg, yield=68%).

$^1\text{H}$  NMR (400 MHz,  $\text{DMSO-}d_6$ ):  $\delta$  9.23 (d,  $J = 6.8$  Hz, 2H), 8.57 (d,  $J = 6.8$  Hz, 2H), 5.36 (s, 2H), 5.16 (s, 1H), 4.88 (s, 1H), 4.00 (s, 3H), 1.72 (s, 3H).

$^{13}\text{C}$  NMR (101 MHz,  $\text{DMSO-}d_6$ ):  $\delta$  162.5, 146.5, 144.1, 139.3, 127.4, 116.6, 65.5, 53.8, 19.4.

$^1\text{H}$ ,  $^{13}\text{C}$  NMR Spectra:







**1p-HBr:**

**1-(but-2-en-1-yl)-4-(methoxycarbonyl)pyridin-1-ium bromide**



**1p-HBr**

**General procedure:** The procedure for synthesis of compound **1p-HBr**: Methyl isonicotinate (5.5mmol) and 1-bromobut-2-ene (5mmol) were added in 3mL of ethyl acetate and stirred at room temperature for 8 hours. Then the resulting precipitate was filtered and washed with ethyl acetate to afford **1p-HBr**, as white solid (952mg, yield=70%).

$^1\text{H NMR}$  (400 MHz,  $\text{DMSO-}d_6$ ):  $\delta$  9.24 (d,  $J = 6.4$  Hz, 2H), 8.52 (d,  $J = 6.0$  Hz, 2H), 6.08 (tt,  $J = 16.4$ , 8.2 Hz, 1H), 5.80 (dq,  $J = 19.8$ , 12.1, 9.5 Hz, 1H), 5.43 (d,  $J = 7.3$  Hz, 0H), 5.30 (d,  $J = 6.8$  Hz, 2H), 3.99 (s, 3H), 1.84 (d,  $J = 7.0$  Hz, 1H), 1.74 (d,  $J = 6.6$  Hz, 2H).

$^{13}\text{C NMR}$  (101 MHz,  $\text{DMSO-}d_6$ ):  $\delta$  162.6, 146.0, 143.8, 135.2, 133.5, 127.2, 127.2, 123.9, 122.4, 62.4, 53.8, 17.6, 13.3.

$^1\text{H}$ ,  $^{13}\text{C}$  NMR Spectra:



### 3. Synthesis of Products and Spectra Data

3aa:

dimethyl 2-(2,3-dioxo-3-phenylpropyl)-2-(pyridin-2-yl)succinate



### 3aa

**General procedure:** 1-(2-oxo-2-phenylethyl)pyridin-1-ium hexafluorophosphate **1a-HBr** (0.84mmol, 233.6mg, 2.8eq.), tetrabutylammonium bromide (0.66mmol, 212.8mg, 2.2eq.), dimethyl 2-methylenesuccinate **2a** (0.3mmol, 47.5mg, 1.0eq.) and *i*-Pr<sub>2</sub>NEt (0.75mmol, 125.0μL, 2.5eq.) were added sequentially to 2.0 mL of dioxane. The reaction mixture was stirred at 45°C for 40h under O<sub>2</sub> atmosphere. Then dioxane was removed and the residue was purified by column chromatography (SiO<sub>2</sub>, hexane/EA=2:1, v/v; R<sub>f</sub>=0.5) to afforded **3aa** as brown oil (57.1mg, yield: 52%).

Instead of **1a-HBr**, **1a-HPF<sub>6</sub>** provided **3aa** in < 5% NMR yield (1,3,5- trimethoxybenzene as internal standard) without the addition of tetrabutylammonium bromide.

<sup>1</sup>H NMR (400 MHz, Chloroform-*d*): δ 8.07 (dd, *J* = 8.4, 1.4 Hz, 2H), 7.95 (ddd, *J* = 4.9, 1.8, 0.9 Hz, 1H), 7.70 – 7.59 (m, 2H), 7.51 – 7.44 (m, 2H), 7.41 (d, *J* = 8.1 Hz, 1H), 7.13 – 7.04 (m, 1H), 4.13 (dd, *J* = 15.6, 0.8 Hz, 1H), 3.79 (s, 3H), 3.68 (s, 3H), 3.59 (d, *J* = 15.6 Hz, 1H), 3.49 – 3.31 (m, 2H).

<sup>13</sup>C NMR (101 MHz, Chloroform-*d*): δ 198.4, 190.7, 173.1, 171.3, 158.0, 147.9, 137.1, 133.8, 132.2, 130.7, 128.4, 122.7, 121.2, 55.9, 52.9, 51.8, 40.5, 39.8.

HRMS(ESI<sup>+</sup>)*m/z*: [M+H]<sup>+</sup> calcd for C<sub>20</sub>H<sub>20</sub>NO<sub>6</sub>, 370.1285; found, 370.1294.

<sup>1</sup>H, <sup>13</sup>C NMR Spectra of **3aa**:





**3ba:**  
**dimethyl 2-(2,3-dioxo-3-phenylpropyl)-2-(4-(methoxycarbonyl)pyridin-2-yl)succinate**



**General procedure:** 4-(methoxycarbonyl)-1-(2-oxo-2-phenylethyl)pyridin-1-ium bromide **1b-HBr** (0.66mmol, 221.9mg, 2.2eq.), dimethyl 2-methylenesuccinate **2a** (0.3mmol, 47.5mg, 1.0eq.) and *i*-Pr<sub>2</sub>NEt (0.6mmol, 100.0μL, 2.0eq.) were added sequentially to 3.0 mL of DCE. The reaction mixture was stirred at room temperature for 15h under O<sub>2</sub> atmosphere. Then DCE was removed and the residue was purified by column chromatography (SiO<sub>2</sub>, hexane/EA=2:1, v/v; R<sub>f</sub>=0.5) to afforded **3ba** as brown oil (73.5mg, yield: 57%).

Instead of **1b-HBr**, **1b-HPF<sub>6</sub>** provided **3ba** in 28% yield (35.7mg).

<sup>1</sup>H NMR (400 MHz, Chloroform-*d*): δ 8.29 – 8.21 (m, 1H), 8.03 (d, *J* = 6.8 Hz, 2H), 7.98 (s, 1H), 7.69 (dd, *J* = 5.1, 1.4 Hz, 1H), 7.66 – 7.58 (m, 1H), 7.48 (t, *J* = 7.8 Hz, 2H), 4.11 (d, *J* = 16.4 Hz, 1H), 3.95 (s, 3H), 3.79 (s, 3H), 3.74 (d, *J* = 16.3 Hz, 1H), 3.67 (s, 3H), 3.52 – 3.33 (m, 2H).

<sup>13</sup>C NMR (101 MHz, Chloroform-*d*): δ 198.8, 190.7, 172.7, 171.0, 165.1, 159.4, 148.9, 138.4, 134.1, 132.0, 130.6, 128.5, 122.0, 120.9, 55.1, 53.1, 52.8, 51.9, 40.8, 40.3.

HRMS(ESI<sup>+</sup>)*m/z*: [M+H]<sup>+</sup> calcd for C<sub>22</sub>H<sub>22</sub>NO<sub>8</sub>, 428.1340; found, 428.1348.

<sup>1</sup>H, <sup>13</sup>C NMR Spectra of **3ba**:



**3ca:**  
dimethyl 2-(4-(tert-butyl)pyridin-2-yl)-2-(2,3-dioxo-3-phenylpropyl)succinate



**General procedure:** 4-(tert-butyl)-1-(2-oxo-2-phenylethyl)pyridin-1-ium bromide **1c-HBr** (0.84mmol, 280.8mg, 2.8eq.), dimethyl 2-methylenesuccinate **2a** (0.3mmol, 47.5mg, 1.0eq.) and *i*-Pr<sub>2</sub>NEt (0.75mmol, 125.0μL, 2.5eq.) were added sequentially to 2.0 mL of DCE. The reaction mixture was stirred at 45 °C for 40h under O<sub>2</sub> atmosphere. Then DCE was removed and the residue was purified by column chromatography (SiO<sub>2</sub>, hexane/EA=2:1, v/v; R<sub>f</sub>=0.6) to afforded **3ca** as brown oil (77.0mg, yield: 60%).

<sup>1</sup>H NMR (400 MHz, Chloroform-*d*): δ 8.11 – 8.04 (m, 2H), 7.78 (dd, *J* = 5.3, 0.7 Hz, 1H), 7.65 – 7.58 (m, 1H), 7.47 (dd, *J* = 8.4, 7.2 Hz, 2H), 7.37 (dd, *J* = 1.8, 0.8 Hz, 1H), 7.06 (dd, *J* = 5.4, 1.8 Hz, 1H), 4.14 (dd, *J* = 15.2, 0.8 Hz, 1H), 3.79 (s, 3H), 3.69 (s, 3H), 3.53 (d, *J* = 15.2 Hz, 1H), 3.49 – 3.29 (m, 2H), 1.26 (s, 9H).

<sup>13</sup>C NMR (101 MHz, CDCl<sub>3</sub>): δ 198.2, 190.7, 173.3, 171.4, 161.4, 157.7, 149.5, 147.5, 133.7, 132.2, 130.7, 128.3, 120.7, 119.9, 117.9, 56.3, 52.8, 51.7, 40.6, 39.5, 34.9, 30.5, 30.4.

HRMS(ESI<sup>+</sup>)*m/z*: [M+H]<sup>+</sup> calcd for C<sub>24</sub>H<sub>28</sub>NO<sub>6</sub>, 426.1911; found, 426.1912.

<sup>1</sup>H, <sup>13</sup>C NMR Spectra of **3ca**:





**3da:**  
**methyl 2-(3,5-dimethylpyridin-2-yl)-2-(2,3-dioxo-3-phenylpropyl)-4-oxohexanoate**



**3da**

**General procedure:** 3,5-dimethyl-1-(2-oxo-2-phenylethyl)pyridin-1-ium bromide **1d-HBr** (0.84mmol, 256.2mg, 2.8eq.), tetrabutylammonium bromide (0.66mmol, 212.8mg, 2.2eq.), dimethyl 2-methylenesuccinate **2a** (0.3mmol, 47.5mg, 1.0eq.) and *t*-Pr<sub>2</sub>NEt (0.75mmol, 125.0μL, 2.5eq.) were added sequentially to 2.0 mL of DCE. The reaction mixture was stirred at 45°C for 40h under O<sub>2</sub> atmosphere. Then DCE was removed and the residue was purified by column chromatography (SiO<sub>2</sub>, hexane/EA=0:1, v/v; R<sub>f</sub>=0.4) to afforded **3da** as brown oil (48.9 mg, yield: 41%).

<sup>1</sup>H NMR (400 MHz, Chloroform-*d*): δ 8.12 (dd, *J* = 8.3, 1.4 Hz, 2H), 7.61 (td, *J* = 7.2, 1.4 Hz, 1H), 7.47 (t, *J* = 7.7 Hz, 2H), 7.38 (s, 1H), 7.24 (s, 1H), 3.84-3.78 (m, 2H), 3.75 (s, 3H), 3.68 (s, 3H), 3.40 – 3.18 (m, 2H), 2.23 (s, 3H), 2.11 (s, 3H).

<sup>13</sup>C NMR (101 MHz, Chloroform-*d*): δ 190.4, 173.5, 170.9, 144.6, 141.2, 133.5, 132.5, 132.3, 130.9, 128.2, 57.9, 52.8, 51.7, 40.0, 37.8, 18.7, 17.6.

HRMS(ESI<sup>+</sup>)*m/z*: [M+H]<sup>+</sup> calcd for C<sub>22</sub>H<sub>24</sub>NO<sub>6</sub>, 398.1598; found, 398.1600.

<sup>1</sup>H, <sup>13</sup>C NMR Spectra of **3da**:



**3ea:**  
 dimethyl 2-(2,3-dioxbutyl)-2-(4-(methoxycarbonyl)pyridin-2-yl)succinate





**General procedure:** 4-(methoxycarbonyl)-1-(2-oxopropyl)pyridin-1-ium hexafluorophosphate **1e-HPF<sub>6</sub>** (0.66mmol, 223.8mg, 2.2eq.), tetrabutylammonium bromide (0.9mmol, 290.1mg, 3.0eq.), dimethyl 2-methylenesuccinate **2a** (0.3mmol, 47.5mg, 1.0eq.) and *t*-Pr<sub>2</sub>NEt (0.6mmol, 100.0μL, 2.0eq.) were added sequentially to 2.0 mL of DCE. The reaction mixture was stirred at room temperature for 15h under O<sub>2</sub> atmosphere. Then DCE was removed and the residue was purified by column chromatography (SiO<sub>2</sub>, hexane/EA=5:1, v/v; R<sub>f</sub>=0.3) to afforded **3ea** as yellow oil (58.9mg, yield: 54%).

Without the addition of tetrabutylammonium bromide, **1e-HPF<sub>6</sub>** provided **3ea** in 30% yield (33.0mg).

<sup>1</sup>H NMR (400 MHz, Chloroform-*d*): δ 8.57 (dd, *J* = 5.0, 0.9 Hz, 1H), 7.93 (s, 1H), 7.76 (dd, *J* = 5.0, 1.5 Hz, 1H), 4.01 (d, *J* = 16.6 Hz, 1H), 3.96 (s, 3H), 3.77 (s, 3H), 3.65 (s, 3H), 3.50 (d, *J* = 16.3 Hz, 1H), 3.43 – 3.24 (m, 2H), 2.37 (s, 3H).

<sup>13</sup>C NMR (101 MHz, Chloroform-*d*): δ 197.1, 196.4, 172.8, 171.1, 165.1, 159.5, 148.8, 138.4, 122.0, 120.9, 54.9, 53.0, 52.8, 51.8, 40.0, 38.0, 23.4.

HRMS(ESI<sup>+</sup>)*m/z*: [M+H]<sup>+</sup> calcd for C<sub>17</sub>H<sub>20</sub>NO<sub>8</sub>, 366.1183; found, 366.1183.

<sup>1</sup>H, <sup>13</sup>C NMR Spectra of **3ea**:





**3fa:**

**4-ethyl 1,2-dimethyl 2-(4-(methoxycarbonyl)pyridin-2-yl)-4-oxobutane-1,2,4-tricarboxylate**



**General procedure:** 1-(2-ethoxy-2-oxoethyl)-4-(methoxycarbonyl)pyridin-1-ium bromide **1f-HPF<sub>6</sub>** (0.84mmol, 310.1mg, 2.8eq.), tetrabutylammonium bromide (1.5mmol, 483.6mg, 5.0eq.), dimethyl 2-methylenesuccinate **2a** (0.3mmol, 47.5mg, 1.0eq.) and *i*-Pr<sub>2</sub>N<sup>+</sup>Et<sup>-</sup> (0.75mmol, 125.0μL, 2.5eq.) were added sequentially to 2.0 mL of dioxane. The reaction mixture was stirred at 45°C for 40h under O<sub>2</sub> atmosphere. Then dioxane was removed and the residue was purified by column chromatography (SiO<sub>2</sub>, hexane/EA=5:1, v/v; R<sub>f</sub>=0.2) to afford **3fa** as yellow oil (50.9mg, yield: 43%).

<sup>1</sup>H NMR (400 MHz, Chloroform-*d*): δ 8.58 (dd, *J* = 5.0, 0.9 Hz, 1H), 7.95 (dd, *J* = 1.4, 0.9 Hz, 1H), 7.75 (dd, *J* = 5.0, 1.5 Hz, 1H), 4.36 (qd, *J* = 7.2, 0.9 Hz, 2H), 4.23 – 4.13 (m, 1H), 3.96 (s, 3H), 3.75 (s, 3H), 3.72 (d, *J* = 17.4 Hz, 1H), 3.65 (s, 3H), 3.49 – 3.29 (m, 2H), 1.39 (t, *J* = 7.1 Hz, 3H).

<sup>13</sup>C NMR (101 MHz, CDCl<sub>3</sub>): δ 191.3, 172.5, 171.2, 165.2, 160.9, 159.2, 149.0, 138.4, 121.9, 120.7, 62.4, 54.6, 53.1, 52.8, 51.8, 41.4, 39.5, 14.1.

HRMS(ESI<sup>+</sup>)*m/z*: [M+H]<sup>+</sup> calcd for C<sub>18</sub>H<sub>22</sub>NO<sub>9</sub>, 396.1289; found, 396.1295.

<sup>1</sup>H, <sup>13</sup>C NMR Spectra of **3fa**:



**3ga:**  
dimethyl 2-(4-(methoxycarbonyl)pyridin-2-yl)-2-(2-oxo-2-phenylethyl)succinate



**General procedure:** 1-benzyl-4-(methoxycarbonyl)pyridin-1-ium bromide **1g-HBr** (0.84mmol, 258.9mg, 2.8eq.), tetrabutylammonium bromide (0.66mmol, 212.8mg, 2.2eq.), dimethyl 2-methylenesuccinate **2a** (0.3mmol, 47.5mg, 1.0eq.) and *t*-Pr<sub>2</sub>NEt (0.75mmol, 125.0μL, 2.5eq.) were added sequentially to 2.0 mL of dioxane. The reaction mixture was stirred at 45°C for 40h under O<sub>2</sub> atmosphere. Then dioxane was removed and the residue was purified by column chromatography (SiO<sub>2</sub>, hexane/EA=2:1, v/v; R<sub>f</sub>=0.5) to afforded **3ga** as brown oil (79.5mg, yield: 66%).

<sup>1</sup>H NMR (400 MHz, Chloroform-*d*): δ 8.68 (dd, *J* = 5.0, 0.9 Hz, 1H), 8.03 – 7.98 (m, 3H), 7.74 (dd, *J* = 5.0, 1.4 Hz, 1H), 7.60 – 7.55 (m, 1H), 7.49 – 7.43 (m, 2H), 4.43 (d, *J* = 18.3 Hz, 1H), 4.13 (d, *J* = 18.2 Hz, 1H), 3.96 (s, 3H), 3.72 (s, 3H), 3.66 (d, *J* = 16.5 Hz, 1H), 3.55 (s, 3H), 3.49 (d, *J* = 16.5 Hz, 1H).

<sup>13</sup>C NMR (101 MHz, CDCl<sub>3</sub>): δ 197.6, 173.2, 171.6, 165.4, 160.6, 149.5, 138.0, 136.8, 133.2, 128.5, 128.1, 121.5, 120.5, 52.8, 52.8, 52.7, 51.5, 42.8, 38.7.

HRMS(ESI<sup>+</sup>)*m/z*: [M+H]<sup>+</sup> calcd for C<sub>21</sub>H<sub>22</sub>NO<sub>7</sub>, 400.1391; found, 400.1389.

<sup>1</sup>H, <sup>13</sup>C NMR Spectra of **3ga**:





### 3ha:

#### dimethyl 2-(4-(methoxycarbonyl)pyridin-2-yl)-2-(4-methyl-2-oxopent-3-en-1-yl)succinate



**General procedure:** 4-(methoxycarbonyl)-1-(3-methylbut-2-en-1-yl)pyridin-1-ium bromide **1h-HBr** (0.66mmol, 188.9mg, 2.2eq.), dimethyl 2-methylenesuccinate **2a** (0.3mmol, 47.5mg, 1.0eq.) and *i*-Pr<sub>2</sub>NEt (0.6mmol, 100.0μL, 2.0eq.) were added sequentially to 3.0 mL of DCE. The reaction mixture was stirred at room temperature for 15h under O<sub>2</sub> atmosphere. Then DCE was removed and the residue was purified by column chromatography (SiO<sub>2</sub>, hexane/EA=2:1, v/v; R<sub>f</sub>=0.5) to afforded **3ha** as brown oil (49.0 mg, yield: 43%).

Instead of **1h-HBr**, **1h-HPF<sub>6</sub>** provided **3ha** in 11% yield (13.1 mg).

<sup>1</sup>H NMR (400 MHz, Chloroform-*d*): δ 8.67 (dd, *J* = 5.0, 0.9 Hz, 1H), 7.94 (t, *J* = 1.1 Hz, 1H), 7.72 (dd, *J* = 5.0, 1.4 Hz, 1H), 6.11 (p, *J* = 1.3 Hz, 1H), 3.95 (s, 3H), 3.75 (d, *J* = 18.0 Hz, 1H), 3.70 (s, 3H), 3.60 (d, *J* = 7.6 Hz, 1H), 3.57-3.55 (M, 4H), 3.39 (d, *J* = 16.5 Hz, 1H), 2.09 (d, *J* = 1.2 Hz, 3H), 1.88 (d, *J* = 1.3 Hz, 3H).

<sup>13</sup>C NMR (101 MHz, CDCl<sub>3</sub>): δ 197.6, 173.3, 171.7, 165.5, 160.8, 156.1, 149.5, 137.9, 123.7, 121.4, 120.5, 52.7, 52.7, 51.5, 47.9, 38.6, 27.7, 20.8.

HRMS(ESI<sup>+</sup>)*m/z*: [M+H]<sup>+</sup> calcd for C<sub>19</sub>H<sub>24</sub>NO<sub>7</sub>, 378.1547; found, 378.1546.

<sup>1</sup>H, <sup>13</sup>C NMR Spectra of **3ha**:



**3ia:**  
dimethyl 2-(2-cyclopropyl-2-oxoethyl)-2-(4-(methoxycarbonyl)pyridin-2-yl)succinate



**General procedure:** 1-(cyclopropylmethyl)-4-(methoxycarbonyl)pyridin-1-ium bromide **1i-HPF<sub>6</sub>** (0.84mmol, 283.2mg, 2.8eq.), tetrabutylammonium bromide (1.5mmol, 483.6mg, 5.0eq.), dimethyl 2-methylenesuccinate **2a** (0.3mmol, 47.5mg, 1.0eq.) and *t*-Pr<sub>2</sub>NEt (0.75mmol, 125.0μL, 2.5eq.) were added sequentially to 2.0 mL of dioxane. The reaction mixture was stirred at 45°C for 40h under O<sub>2</sub> atmosphere. Then dioxane was removed and the residue was purified by column chromatography (SiO<sub>2</sub>, hexane/EA=2:1, v/v; R<sub>f</sub>=0.6) to afford **3ia** as brown oil (41.5mg, yield: 38%).

<sup>1</sup>H NMR (400 MHz, Chloroform-*d*): δ 8.68 (dd, *J* = 5.0, 0.9 Hz, 1H), 7.93 (s, 1H), 7.73 (dd, *J* = 5.0, 1.4 Hz, 1H), 3.98-3.90 (m, 4H), 3.75 – 3.68 (m, 4H), 3.59 (s, 3H), 3.53 (d, *J* = 16.5 Hz, 1H), 3.37 (d, *J* = 16.4 Hz, 1H), 1.97 (tt, *J* = 7.8, 4.6 Hz, 1H), 1.03 – 0.90 (m, 2H), 0.90 – 0.83 (m, 2H).

<sup>13</sup>C NMR (101 MHz, CDCl<sub>3</sub>): δ 208.1, 173.1, 171.7, 165.4, 160.6, 149.5, 138.0, 121.5, 120.5, 52.8, 52.7, 52.6, 51.6, 47.1, 38.6, 21.2, 10.8, 10.7.

HRMS(ESI<sup>+</sup>)*m/z*: [M+H]<sup>+</sup> calcd for C<sub>18</sub>H<sub>22</sub>NO<sub>7</sub>, 364.1391; found, 364.1391.

<sup>1</sup>H, <sup>13</sup>C NMR Spectra of **3ia**:





**3ja:**  
**dimethyl 2-(2,3-dioxo-3-phenylpropyl)-2-(isoquinolin-1-yl)malonate**



**3ja**

**General procedure:** 2-(2-oxo-2-phenylethyl)isoquinolin-2-ium bromide **1j-HBr** (0.84mmol, 275.7mg, 2.8eq.), tetrabutylammonium bromide (0.66mmol, 212.8mg, 2.2eq.), dimethyl 2-methylenesuccinate **2a** (0.3mmol, 47.5mg, 1.0eq.) and *t*-Pr<sub>2</sub>NEt (0.75mmol, 125.0μL, 2.5eq.) were added sequentially to 2.0 mL of dioxane. The reaction mixture was stirred at 45 °C for 40h under O<sub>2</sub> atmosphere. Then dioxane was removed and the residue was purified by column chromatography (SiO<sub>2</sub>, hexane/EA=0:1, v/v; R<sub>f</sub>=0.5) to afforded **3ja** as yellow oil (65.9mg, yield: 52%).

Instead of **1j-HBr**, **1j-HPF<sub>6</sub>** provided **3ja** in <10% yield.

<sup>1</sup>H NMR (400 MHz, Chloroform-*d*): δ 8.14 (dd, *J* = 8.4, 1.4 Hz, 2H), 8.05 (dd, *J* = 8.6, 1.0 Hz, 1H), 7.82 (dt, *J* = 8.1, 0.9 Hz, 1H), 7.70 – 7.56 (m, 4H), 7.52 – 7.43 (m, 3H), 4.10 – 3.87 (m, 2H), 3.69 (d, *J* = 10.6 Hz, 6H), 3.58 (s, 2H).

<sup>13</sup>C NMR (101 MHz, Chloroform-*d*): δ 196.4, 190.5, 174.4, 170.9, 156.6, 139.3, 137.1, 133.6, 132.4, 131.0, 130.0, 128.4, 128.2, 128.0, 125.8, 124.1, 121.7, 59.3, 53.1, 51.8, 39.8, 38.8.

HRMS(ESI<sup>+</sup>)*m/z*: [M+H]<sup>+</sup> calcd for C<sub>24</sub>H<sub>22</sub>NO<sub>6</sub>, 420.1442; found, 420.1441.

<sup>1</sup>H, <sup>13</sup>C NMR Spectra:





**3ka:**  
dimethyl 2-(4-(methoxycarbonyl)pyridin-2-yl)-2-(2-(4-methoxyphenyl)-2-oxoethyl)succinate



**General procedure:** 1-(4-methoxybenzyl)-4-(methoxycarbonyl)pyridin-1-ium chloride **1k-HCl** (0.84mmol, 246.7mg, 2.8eq.), tetrabutylammonium bromide (1.5mmol, 483.6mg, 5.0eq.), dimethyl 2-methylsuccinate **2a** (0.3mmol, 47.5mg, 1.0eq.) and *t*-Pr<sub>2</sub>NEt (0.75mmol, 125.0μL, 2.5eq.) were added sequentially to 2.0 mL of DCE. The reaction mixture was stirred at 45°C for 40h under O<sub>2</sub> atmosphere. Then DCE was removed and the residue was purified by column chromatography (SiO<sub>2</sub>, hexane/EA=2:1, v/v; R<sub>f</sub>=0.5) to afforded **3ka** as yellow oil (61.5mg, yield: 48%).

<sup>1</sup>H NMR (400 MHz, Chloroform-*d*): δ 8.68 (dd, *J* = 5.0, 0.8 Hz, 1H), 8.03 – 7.94 (m, 3H), 7.74 (dd, *J* = 5.0, 1.4 Hz, 1H), 6.93 (d, *J* = 8.9 Hz, 2H), 4.38 (d, *J* = 18.1 Hz, 1H), 4.07 (d, *J* = 18.1 Hz, 1H), 3.96 (s, 3H), 3.87 (s, 3H), 3.72 (s, 3H), 3.66 (d, *J* = 16.5 Hz, 1H), 3.54 (s, 3H), 3.48 (d, *J* = 16.5 Hz, 1H).

<sup>13</sup>C NMR (101 MHz, Chloroform-*d*): δ 196.0, 173.3, 171.7, 165.4, 163.6, 160.7, 149.5, 137.9, 130.3, 129.8, 121.4, 120.5, 113.6, 55.4, 52.8, 52.7, 51.5, 42.5, 38.6.

HRMS(ESI<sup>+</sup>)*m/z*: [M+Na]<sup>+</sup> calcd for C<sub>22</sub>H<sub>23</sub>NNaO<sub>8</sub>, 452.1316; found, 452.1315.

<sup>1</sup>H, <sup>13</sup>C NMR Spectra:





**3la:**  
**dimethyl 2-(4-(methoxycarbonyl)pyridin-2-yl)-2-(2-(4-nitrophenyl)-2-oxoethyl)succinate**



**3la**

**General procedure:** 4-(methoxycarbonyl)-1-(4-nitrobenzyl)pyridin-1-ium bromide **11-HBr** (0.84mmol, 296.5mg, 2.8eq.), tetrabutylammonium bromide (0.66mmol, 212.8mg, 2.2eq.), dimethyl 2-methylenesuccinate **2a** (0.3mmol, 47.5mg, 1.0eq.) and *i*-Pr<sub>2</sub>NEt (0.75mmol, 125.0μL, 2.5eq.) were added sequentially to 2.0 mL of DCE. The reaction mixture was stirred at 45°C for 15h under O<sub>2</sub> atmosphere. Then DCE was removed and the residue was purified by column chromatography (SiO<sub>2</sub>, hexane/EA=2:1, v/v; R<sub>f</sub>=0.5) to afford **3la** as yellow oil (54.3mg, yield: 41%).

<sup>1</sup>H NMR (400 MHz, Chloroform-*d*): δ 8.65 (dd, *J* = 5.0, 0.9 Hz, 1H), 8.31 (d, *J* = 8.8 Hz, 2H), 8.17 (d, *J* = 8.8 Hz, 2H), 7.76 (dd, *J* = 5.0, 1.4 Hz, 1H), 4.47 (d, *J* = 18.3 Hz, 1H), 4.14 (d, *J* = 18.2 Hz, 1H), 3.97 (s, 3H), 3.75 (s, 3H), 3.67 – 3.56 (m, 4H), 3.49 (d, *J* = 16.5 Hz, 1H).

<sup>13</sup>C NMR (101 MHz, Chloroform-*d*): δ 196.4, 172.8, 171.5, 165.2, 159.8, 150.2, 149.5, 141.4, 138.2, 129.1, 123.7, 121.7, 120.5, 53.1, 53.0, 52.7, 51.7, 42.9, 38.8.

HRMS(ESI<sup>+</sup>)*m/z*: [M+H]<sup>+</sup> calcd for C<sub>21</sub>H<sub>21</sub>N<sub>2</sub>O<sub>9</sub>, 445.1242; found, 370.1236.

<sup>1</sup>H, <sup>13</sup>C NMR Spectra:



**3ma:**  
**dimethyl 2-(4-(methoxycarbonyl)pyridin-2-yl)-2-(2-oxopent-3-yn-1-yl)succinate**



**3ma**

**General procedure:** 1-(but-2-yn-1-yl)-4-(methoxycarbonyl)pyridin-1-ium bromide **1m-HBr** (0.66mmol, 178.3mg, 2.2eq.), tetrabutylammonium bromide (0.84mmol, 270.8mg, 2.8eq.), dimethyl 2-methylsuccinate **2a** (0.3mmol, 47.5mg, 1.0eq.) and *t*-Pr<sub>2</sub>NEt (0.6mmol, 100.0μL, 2.0eq.) were added sequentially to 2.0 mL of DCE. The reaction mixture was stirred at 25°C for 15h under O<sub>2</sub> atmosphere. Then DCE was removed and the residue was purified by column chromatography (SiO<sub>2</sub>, hexane/EA=2:1, v/v; R<sub>f</sub>=0.5) to afford **3ma** as yellow oil (18.1mg, yield: 17%).

<sup>1</sup>H NMR (400 MHz, Chloroform-*d*): δ 8.72 – 8.62 (m, 1H), 7.93 (s, 1H), 7.79 – 7.68 (m, 1H), 3.92 (m, 4H), 3.72 (m, 4H), 3.60 (s, 3H), 3.53 (d, *J* = 16.6 Hz, 1H), 3.40 (d, *J* = 16.6 Hz, 1H), 2.00 (s, 3H).

<sup>13</sup>C NMR (101 MHz, Chloroform-*d*): δ 184.5, 172.6, 171.4, 165.4, 159.9, 149.6, 138.0, 121.6, 120.5, 90.4, 80.3, 52.9, 52.7, 52.6, 51.6, 49.1, 38.6, 4.1.

HRMS(ESI<sup>+</sup>)*m/z*: [M+Na]<sup>+</sup> calcd for C<sub>18</sub>H<sub>19</sub>NNaO<sub>7</sub>, 384.1054; found, 384.1053.

<sup>1</sup>H, <sup>13</sup>C NMR Spectra :





### 3bb:

**methyl 2-(1-methoxy-2-methyl-1,4,5-trioxo-5-phenylpentan-2-yl)isonicotinate**



**General procedure:** 4-(methoxycarbonyl)-1-(2-oxo-2-phenylethyl)pyridin-1-ium bromide **1b-HBr** (0.66mmol, 221.9mg, 2.2eq.), methyl methacrylate **2b** (0.3mmol, 33.0μL, 1.0eq.) and *i*-Pr<sub>2</sub>NEt (0.6mmol, 100.0μL, 2.0eq.) were added sequentially to 2.0 mL of DCE. The reaction mixture was stirred at room temperature for 15h under O<sub>2</sub> atmosphere. Then DCE was removed and the residue was purified by column chromatography (SiO<sub>2</sub>, hexane/EA=5:1, v/v; R<sub>f</sub>=0.4) to afforded **3bb** as yellow oil (56.0mg, yield: 51%).

Instead of **1b-HBr**, **1b-HPF<sub>6</sub>** provided **3bb** in 20% yield (22.1mg).

<sup>1</sup>H NMR (400 MHz, Chloroform-*d*): δ 8.21 (d, *J* = 5.1 Hz, 1H), 8.08 – 8.01 (m, 2H), 7.99 (s, 1H), 7.69 – 7.57 (m, 2H), 7.48 (t, *J* = 7.8 Hz, 2H), 3.95 (s, 3H), 3.78 (s, 3H), 3.70 – 3.55 (m, 2H), 1.85 (s, 3H).

<sup>13</sup>C NMR (101 MHz, Chloroform-*d*): δ 198.4, 191.0, 174.5, 165.3, 161.5, 148.3, 138.2, 134.1, 132.0, 130.6, 128.5, 121.6, 121.4, 53.6, 52.7, 52.7, 44.8, 24.8.

HRMS(ESI<sup>+</sup>)*m/z*: [M+H]<sup>+</sup> calcd for C<sub>20</sub>H<sub>20</sub>NO<sub>6</sub>, 370.1285; found, 370.1282.

<sup>1</sup>H, <sup>13</sup>C NMR Spectra of **3bb**:



**3bc:**  
methyl 2-(1-(allyloxy)-2-methyl-1,4,5-trioxo-5-phenylpentan-2-yl)isonicotinate



**General procedure:** 4-(methoxycarbonyl)-1-(2-oxo-2-phenylethyl)pyridin-1-ium bromide **1b-HBr** (0.84mmol, 282.4mg, 2.8eq.), allyl methacrylate **2c** (0.3mmol, 41.0 $\mu$ L, 1.0eq.), tetrabutylammonium bromide (0.66mmol, 212.8mg, 2.2eq.) and *i*-Pr<sub>2</sub>NEt (0.75mmol, 125.0 $\mu$ L, 2.5eq.) were added sequentially to 2.0 mL of dioxane. The reaction mixture was stirred at 45°C for 40h under O<sub>2</sub> atmosphere. Then dioxane was removed and the residue was purified by column chromatography (SiO<sub>2</sub>, hexane/EA=5:1, v/v; R<sub>f</sub>=0.5) to afforded **3bc** as yellow oil (77.2mg, yield: 65%).

<sup>1</sup>H NMR (400 MHz, Chloroform-*d*):  $\delta$  8.22 (d, *J* = 5.0 Hz, 1H), 8.06 – 8.00 (m, 3H), 7.67 (d, *J* = 4.8 Hz, 1H), 7.62 (td, *J* = 7.5, 1.6 Hz, 1H), 7.47 (td, *J* = 7.8, 1.6 Hz, 2H), 5.98 – 5.85 (m, 1H), 5.31 – 5.20 (m, 2H), 4.69 (dt, *J* = 5.7, 1.4 Hz, 2H), 3.95 (s, 3H), 3.64 (q, *J* = 16.2 Hz, 2H), 1.86 (s, 3H).

<sup>13</sup>C NMR (101 MHz, CDCl<sub>3</sub>):  $\delta$  198.3, 191.1, 173.6, 165.3, 161.4, 148.3, 138.1, 134.0, 132.0, 131.8, 130.6, 128.5, 121.6, 121.4, 118.4, 66.1, 53.6, 52.7, 44.7, 24.8.

HRMS(ESI<sup>+</sup>)*m/z*: [M+H]<sup>+</sup> calcd for C<sub>22</sub>H<sub>22</sub>NO<sub>6</sub>, 396.1442; found, 396.1444.

<sup>1</sup>H, <sup>13</sup>C NMR Spectra of **3bc**:







**3bd:**

**methyl 2-(1-(benzyloxy)-2-methyl-1,4,5-trioxo-5-phenylpentan-2-yl)isonicotinate**



**General procedure:** 4-(methoxycarbonyl)-1-(2-oxo-2-phenylethyl)pyridin-1-ium bromide **1b-HBr** (0.84mmol, 282.4mg, 2.8eq.), Benzyl methacrylate **2d** (0.3mmol, 51.0 $\mu$ L, 1.0eq.), tetrabutylammonium bromide (0.66mmol, 212.8mg, 2.2eq.) and *i*-Pr<sub>2</sub>NEt (0.75mmol, 125.0 $\mu$ L, 2.5eq.) were added sequentially to 2.0 mL of dioxane. The reaction mixture was stirred at 45°C for 40h under O<sub>2</sub> atmosphere. Then dioxane was removed and the residue was purified by column chromatography (SiO<sub>2</sub>, hexane/EA=5:1, v/v; R<sub>f</sub>=0.45) to afforded **3bd** as yellow oil (58.1mg, yield: 43%).

<sup>1</sup>H NMR (400 MHz, Chloroform-*d*):  $\delta$  8.20 (d, *J* = 5.1 Hz, 1H), 8.03 – 7.94 (m, 3H), 7.66 (dd, *J* = 5.0, 1.4 Hz, 1H), 7.64 – 7.58 (m, 1H), 7.44 (t, *J* = 7.7 Hz, 2H), 7.35-7.29 (m, 5H), 5.22 (s, 2H), 3.93 (s, 3H), 3.64 (q, *J* = 16.1 Hz, 2H), 1.85 (s, 3H).

<sup>13</sup>C NMR (101 MHz, CDCl<sub>3</sub>):  $\delta$  198.4, 191.1, 173.8, 165.3, 161.4, 148.3, 138.1, 135.5, 134.0, 132.0, 130.6, 128.5, 128.4, 128.1, 128.1, 121.6, 121.4, 67.3, 53.6, 52.7, 44.7, 24.7.

HRMS(ESI<sup>+</sup>)*m/z*: [M+H]<sup>+</sup> calcd for C<sub>26</sub>H<sub>24</sub>NO<sub>6</sub>, 446.1598; found, 446.1597.

<sup>1</sup>H, <sup>13</sup>C NMR Spectra of **3bd**:



**3be:**  
methyl 2-(2-methyl-1,4,5-trioxo-1-phenoxy-5-phenylpentan-2-yl)isonicotinate



**General procedure:** 4-(methoxycarbonyl)-1-(2-oxo-2-phenylethyl)pyridin-1-ium bromide **1b-HBr** (0.84mmol, 282.4mg, 2.8eq.), Phenyl methacrylate **2e** (0.3mmol, 47.0 $\mu$ L, 1.0eq.), tetrabutylammonium bromide (0.66mmol, 212.8mg, 2.2eq.) and *i*-Pr<sub>2</sub>NEt (0.75mmol, 125.0 $\mu$ L, 2.0eq.) were added sequentially to 2.0 mL of dioxane. The reaction mixture was stirred at 45°C for 40h under O<sub>2</sub> atmosphere. Then dioxane was removed and the residue was purified by column chromatography (SiO<sub>2</sub>, hexane/EA=5:1, v/v; R<sub>f</sub>=0.45) to afforded **3be** as brown oil (63.6mg, yield: 49%).

<sup>1</sup>H NMR (400 MHz, Chloroform-*d*):  $\delta$  8.26 (dd, *J* = 5.0, 0.9 Hz, 1H), 8.12 (t, *J* = 1.2 Hz, 1H), 8.08 – 8.05 (m, 2H), 7.71 (dd, *J* = 5.1, 1.5 Hz, 1H), 7.65 – 7.60 (m, 1H), 7.48 (t, *J* = 7.8 Hz, 2H), 7.40 – 7.35 (m, 2H), 7.25 – 7.16 (m, 3H), 3.95 (s, 3H), 3.86 (d, *J* = 16.3 Hz, 1H), 3.69 (d, *J* = 16.3 Hz, 1H), 1.99 (s, 3H).

<sup>13</sup>C NMR (101 MHz, Chloroform-*d*):  $\delta$  198.3, 191.1, 172.9, 165.3, 161.0, 150.8, 148.4, 138.3, 134.2, 132.0, 130.7, 129.4, 128.6, 126.0, 121.8, 121.7, 121.4, 53.6, 52.8, 45.1, 25.1.

HRMS(ESI<sup>+</sup>)*m/z*: [M+H]<sup>+</sup> calcd for C<sub>25</sub>H<sub>22</sub>NO<sub>6</sub>, 432.1442; found, 432.1437.

<sup>1</sup>H, <sup>13</sup>C NMR Spectra of **3be**:





**3bf:**  
methyl 2-(1-isopropoxy-2-methyl-1,4,5-trioxo-5-phenylpentan-2-yl)isonicotinate



**General procedure:** 4-(methoxycarbonyl)-1-(2-oxo-2-phenylethyl)pyridin-1-ium bromide **1b-HBr** (0.66mmol, 221.9mg, 2.2eq.), methacrylic acid isopropyl ester **2f** (0.3mmol, 44.0 $\mu$ L, 1.0eq.) and *i*-Pr<sub>2</sub>N<sup>+</sup>Et<sup>-</sup> (1.05mmol, 175.0 $\mu$ L, 3.5eq.) were added sequentially to 3.0 mL of DCE. The reaction mixture was stirred at room temperature for 15h under O<sub>2</sub> atmosphere. Then DCE was removed and the residue was purified by column chromatography (SiO<sub>2</sub>, hexane/EA=5:1, v/v; R<sub>f</sub>=0.6) to afforded **3bf** as yellow oil (53.0mg, yield: 45%).

Instead of **1b-HBr**, **1b-HPF<sub>6</sub>** provided **3bf** in 29% yield (34.2mg).

<sup>1</sup>H NMR (400 MHz, Chloroform-*d*):  $\delta$  8.21 (d,  $J$  = 5.1 Hz, 1H), 8.07 – 7.99 (m, 3H), 7.63 (ddt,  $J$  = 16.2, 6.9, 1.4 Hz, 2H), 7.48 (t,  $J$  = 7.8 Hz, 2H), 5.14 (dt,  $J$  = 12.7, 6.4 Hz, 1H), 3.95 (s, 3H), 3.61 (d,  $J$  = 2.3 Hz, 2H), 1.82 (s, 3H), 1.25 (dd,  $J$  = 6.3, 2.5 Hz, 6H).

<sup>13</sup>C NMR (101 MHz, Chloroform-*d*):  $\delta$  198.5, 191.2, 173.4, 165.4, 161.7, 148.2, 138.0, 134.0, 132.1, 130.6, 128.5, 121.5, 121.4, 69.1, 53.6, 52.7, 44.6, 24.9, 21.6, 21.5.

HRMS(ESI<sup>+</sup>)*m/z*: [M+H]<sup>+</sup> calcd for C<sub>22</sub>H<sub>24</sub>NO<sub>6</sub>, 398.1598; found, 398.1602.

<sup>1</sup>H, <sup>13</sup>C NMR Spectra of **3bf**:



**3bg:**  
methyl 2-(1-(tert-butoxy)-2-methyl-1,4,5-trioxo-5-phenylpentan-2-yl)isonicotinate



**General procedure:** 4-(methoxycarbonyl)-1-(2-oxo-2-phenylethyl)pyridin-1-ium bromide **1b-HBr** (0.84mmol, 282.4mg, 2.8eq.), tert-butyl methacrylate **2g** (0.3mmol, 49.0μL, 1.0eq.), tetrabutylammonium bromide (0.66mmol, 212.8mg, 2.2eq.) and *t*-Pr<sub>2</sub>NEt (0.75mmol, 125.0μL, 2.5 eq.) were added sequentially to 2.0 mL of dioxane. The reaction mixture was stirred at 45°C for 40h under O<sub>2</sub> atmosphere. Then dioxane was removed and the residue was purified by column chromatography (SiO<sub>2</sub>, hexane/EA=5:1, v/v; R<sub>f</sub>=0.7) to afforded **3bg** as yellow oil (62.4mg, yield: 51%).

<sup>1</sup>H NMR (400 MHz, Chloroform-*d*): δ 8.20 (d, *J* = 5.1 Hz, 1H), 8.05 (dt, *J* = 7.1, 1.4 Hz, 2H), 8.01 (t, *J* = 1.2 Hz, 1H), 7.67 – 7.60 (m, 2H), 7.48 (t, *J* = 7.7 Hz, 2H), 3.95 (s, 3H), 3.58 (d, *J* = 1.9 Hz, 2H), 1.79 (s, 3H), 1.48 (s, 9H).

<sup>13</sup>C NMR (101 MHz, CDCl<sub>3</sub>): δ 191.4, 173.0, 165.5, 162.0, 148.2, 137.9, 134.0, 132.2, 130.7, 130.1, 128.5, 121.7, 121.3, 81.9, 54.3, 52.8, 44.6, 27.8, 25.2.

HRMS(ESI<sup>+</sup>)*m/z*: [M+H]<sup>+</sup> calcd for C<sub>23</sub>H<sub>26</sub>NO<sub>6</sub>, 412.1755; found, 412.1752.

<sup>1</sup>H, <sup>13</sup>C NMR Spectra of **3bg**:





### 3bh:

**methyl 2-(3-(2,3-dioxo-3-phenylpropyl)-2-oxotetrahydrofuran-3-yl)isonicotinate**



**General procedure:** 4-(methoxycarbonyl)-1-(2-oxo-2-phenylethyl)pyridin-1-ium bromide **1b-HBr** (0.84mmol, 282.4mg, 2.8eq.), tulipalin A **2h** (0.3mmol, 27.0 $\mu$ L, 1.0eq.), tetrabutylammonium bromide (0.66mmol, 212.8mg, 2.2eq.) and *t*-Pr<sub>2</sub>NEt (0.75mmol, 125.0 $\mu$ L, 2.5eq.) were added sequentially to 2.0 mL of dioxane. The reaction mixture was stirred at 45 $^{\circ}$ C for 40h under O<sub>2</sub> atmosphere. Then dioxane was removed and the residue was purified by column chromatography (SiO<sub>2</sub>, hexane/EA=2:1, v/v; R<sub>f</sub>=0.5) to afford **3bh** as yellow oil (70.0mg, yield: 62%).

<sup>1</sup>H NMR (400 MHz, Chloroform-*d*):  $\delta$  8.51 – 8.45 (m, 1H), 8.03 (dd, *J* = 8.3, 1.4 Hz, 2H), 7.98 – 7.93 (m, 1H), 7.76 (dd, *J* = 5.0, 1.4 Hz, 1H), 7.68 – 7.61 (m, 1H), 7.50 (t, *J* = 7.8 Hz, 2H), 4.60 (ddd, *J* = 9.0, 7.0, 5.1 Hz, 1H), 4.45 – 4.38 (m, 1H), 4.03 (d, *J* = 17.5 Hz, 1H), 3.95 (s, 3H), 3.33 (d, *J* = 17.6 Hz, 1H), 3.02 – 2.96 (m, 2H).

<sup>13</sup>C NMR (101 MHz, CDCl<sub>3</sub>):  $\delta$  198.7, 190.6, 177.8, 164.9, 159.0, 149.8, 138.9, 134.6, 131.6, 130.5, 128.7, 122.3, 120.1, 66.3, 52.9, 52.8, 42.9, 33.7.

HRMS(ESI<sup>+</sup>)*m/z*: [M+H]<sup>+</sup> calcd for C<sub>20</sub>H<sub>18</sub>NO<sub>6</sub>, 368.1129; found, 368.1129.

<sup>1</sup>H, <sup>13</sup>C NMR Spectra of **3bh**:



**3fi:**  
 methyl 2-((1S)-2-(2-ethoxy-2-oxoacetyl)-1-(methoxycarbonyl)cyclopentyl)isonicotinate





**3fi**

**General procedure:** 1-(2-ethoxy-2-oxoethyl)-4-(methoxycarbonyl)pyridin-1-ium bromide **1f-PF<sub>6</sub>** (0.84mmol, 310.1mg, 2.8eq.), methyl 1-cyclopentenoate **2i** (0.3mmol, 37.0μL, 1.0eq.), tetrabutylammonium bromide (1.5mmol, 483.6mg, 5.0eq.) and <sup>t</sup>Pr<sub>2</sub>NEt (0.75mmol, 125.0μL, 2.5eq.) were added sequentially to 2.0 mL of dioxane. The reaction mixture was stirred at 45 °C for 40h under O<sub>2</sub> atmosphere. Then dioxane was removed and the residue was purified by column chromatography (SiO<sub>2</sub>, hexane/EA=2:1, v/v; R<sub>f</sub>=0.5) to afforded **3fi** as yellow oil (24.2mg, yield: 22%).

<sup>1</sup>H NMR (400 MHz, Chloroform-*d*): δ 8.45 (d, *J* = 5.0 Hz, 1H), 7.95 (t, *J* = 1.2 Hz, 1H), 7.72 (dd, *J* = 5.2, 1.5 Hz, 1H), 4.49 (dd, *J* = 8.4, 6.2 Hz, 1H), 4.32 – 4.20 (m, 2H), 3.96 (s, 3H), 3.73 (s, 3H), 2.73 (ddd, *J* = 12.9, 7.8, 5.2 Hz, 1H), 2.40 (dt, *J* = 12.8, 7.9 Hz, 1H), 2.20 – 2.10 (m, 1H), 1.99 (ddt, *J* = 13.2, 9.0, 6.3 Hz, 1H), 1.90 – 1.75 (m, 2H), 1.30 (t, *J* = 7.1 Hz, 3H).

<sup>13</sup>C NMR (101 MHz, CDCl<sub>3</sub>): δ 174.3, 165.2, 162.1, 159.8, 147.1, 122.8, 121.8, 100.0, 67.1, 61.9, 53.0, 52.8, 52.8, 38.6, 27.7, 23.5, 14.1.

HRMS(ESI<sup>+</sup>)*m/z*: [M+H]<sup>+</sup> calcd for C<sub>18</sub>H<sub>22</sub>NO<sub>7</sub>, 364.1391; found, 364.1394.

<sup>1</sup>H, <sup>13</sup>C NMR Spectra of **3fi**:





### 3aj:

**N-(4-cyano-3-(trifluoromethyl)phenyl)-2-methyl-4,5-dioxo-5-phenyl-2-(pyridin-2-yl)pentanamide**



### 3aj

**General procedure:** 1-(2-oxo-2-phenylethyl)pyridin-1-ium bromide **1a-HBr** (0.75mmol, 208.5mg, 1.5eq.), tetrabutylammonium bromide (0.75mmol, 241.8mg, 1.5eq.), N-(4-cyano-3-(trifluoromethyl)phenyl)methacrylamide **2j** (0.5mmol, 127.1mg, 1.0eq.) and DABCO (1.25mmol, 140.3mg, 2.5eq.) were added sequentially to 5.0 mL of dioxane. The reaction mixture was stirred at 50°C for 15h under O<sub>2</sub> atmosphere. Then dioxane was removed and the residue was purified by column chromatography (SiO<sub>2</sub>, hexane/EA=2:1, v/v; R<sub>f</sub>=0.5) to afforded **3aj** as yellow oil (43.3mg, yield: 31%).

<sup>1</sup>H NMR (400 MHz, Chloroform-*d*): δ 10.01 (s, 1H), 8.62 (dd, *J* = 4.8, 1.5 Hz, 1H), 8.33 – 8.22 (m, 3H), 8.03 (dd, *J* = 8.6, 2.1 Hz, 1H), 7.89 (td, *J* = 7.7, 1.8 Hz, 1H), 7.73 – 7.59 (m, 3H), 7.49 (t, *J* = 7.9 Hz, 2H), 7.41 – 7.35 (m, 1H), 3.18 (d, *J* = 13.8 Hz, 1H), 2.59 (d, *J* = 13.9 Hz, 1H), 1.87 (s, 3H).

<sup>13</sup>C NMR (101 MHz, Chloroform-*d*): δ 196.1, 174.8, 159.4, 148.0, 142.7, 138.9, 134.8, 134.0, 133.9, 133.0 (q, *J* = 32.7 Hz), 130.5, 128.5, 126.7, 123.3, 122.1 (q, *J* = 272.0 Hz), 121.9 (q, *J* = 5.0 Hz), 121.8, 115.6, 105.8, 95.2, 51.7, 47.8, 23.0.

<sup>19</sup>F NMR (376 MHz, CDCl<sub>3</sub>): δ -62.00.

HRMS(ESI<sup>+</sup>)*m/z*: [M+H]<sup>+</sup> calcd for C<sub>25</sub>H<sub>19</sub>F<sub>3</sub>N<sub>3</sub>O<sub>3</sub>, 466.1373; found, 466.1380.

<sup>1</sup>H, <sup>13</sup>C and <sup>19</sup>F NMR Spectra :





**Other products :**



**3oa:**

**dimethyl 2-(4-(methoxycarbonyl)pyridin-2-yl)-2-(3-methyl-2-oxobut-3-en-1-yl)succinate**



**General procedure:** 4-(methoxycarbonyl)-1-(2-methylallyl)pyridin-1-ium bromide **1o-HBr** (0.66mmol, 179.6mg, 2.2eq.), tetrabutylammonium bromide (0.84mmol, 270.8mg, 2.8eq.), dimethyl 2-methylsuccinate **2a** (0.3mmol, 47.5mg, 1.0eq.) and <sup>i</sup>Pr<sub>2</sub>NEt (0.75mmol, 125.0μL, 2.5eq.) were

added sequentially to 2.0 mL of DCE. The reaction mixture was stirred at 25°C for 15h under O<sub>2</sub> atmosphere. Then DCE was removed and the residue was purified by column chromatography (SiO<sub>2</sub>, hexane/EA=2:1, v/v; R<sub>f</sub>=0.5) to afforded **3oa** as yellow oil (NMR yield: 25%, 1,3,5-trimethoxybenzene as internal standard).

<sup>1</sup>H NMR (400 MHz, Chloroform-*d*): δ 8.67 (dd, *J* = 5.0, 0.9 Hz, 1H), 7.95 (s, 1H), 7.73 (dd, *J* = 5.0, 1.4 Hz, 1H), 6.09 (s, 1H), 5.80 (d, *J* = 1.4 Hz, 1H), 4.12 (d, *J* = 18.1 Hz, 1H), 3.96 (s, 3H), 3.80 (d, *J* = 18.0 Hz, 1H), 3.71 (s, 3H), 3.57 (s, 4H), 3.37 (d, *J* = 16.4 Hz, 1H), 1.84 (s, 3H).

<sup>13</sup>C NMR (101 MHz, Chloroform-*d*): δ 199.3, 173.3, 171.7, 165.5, 160.7, 149.5, 144.4, 138.0, 125.2, 121.5, 120.5, 52.9, 52.8, 52.7, 51.6, 41.9, 38.6, 17.5.

<sup>1</sup>H, <sup>13</sup>C NMR Spectra :





**3pa:**  
dimethyl (E)-2-(4-(methoxycarbonyl)pyridin-2-yl)-2-(2-oxopent-3-en-1-yl)succinate



**General procedure:** 1-(but-2-en-1-yl)-4-(methoxycarbonyl)pyridin-1-ium bromide **1p-HBr** (0.66mmol, 179.6mg, 2.2eq.), tetrabutylammonium bromide (0.84mmol, 270.8mg, 2.8eq.), dimethyl 2-methylenesuccinate **2a** (0.3mmol, 47.5mg, 1.0eq.) and *t*-Pr<sub>2</sub>NEt (0.75mmol, 125.0μL, 2.5eq.) were added sequentially to 2.0 mL of DCE. The reaction mixture was stirred at 25°C for 15h under O<sub>2</sub> atmosphere. Then DCE was removed and the residue was purified by column chromatography (SiO<sub>2</sub>, hexane/EA=2:1, v/v; R<sub>f</sub>=0.5) to afforded **3pa** as yellow oil (NMR yield: 22%, 1,3,5-trimethoxybenzene as internal standard).

<sup>1</sup>H NMR (400 MHz, Chloroform-*d*): δ 8.68 (dd, *J* = 5.0, 0.9 Hz, 1H), 7.95 (d, *J* = 0.5 Hz, 1H), 7.73 (dd, *J* = 5.0, 1.5 Hz, 1H), 6.99 – 6.86 (m, 1H), 6.12 (dd, *J* = 15.8, 1.7 Hz, 1H), 3.96 (s, 4H), 3.70 (s, 4H), 3.63 – 3.54 (m, 4H), 3.40 (d, *J* = 16.5 Hz, 1H), 1.90 (dd, *J* = 6.8, 1.7 Hz, 3H).

<sup>13</sup>C NMR (101 MHz, Chloroform-*d*) δ 197.3, 173.2, 171.7, 165.5, 160.7, 149.5, 143.3, 138.0, 131.8, 121.5, 120.5, 52.8, 52.7, 52.6, 51.6, 44.1, 38.6, 18.3.

<sup>1</sup>H, <sup>13</sup>C NMR Spectra:



## 4. Mechanism Study

### Synthesis of 4ja:



**4ja**: methyl 3-benzoyl-1-(2-methoxy-2-oxoethyl)-1,2,3,10b-tetrahydropyrrolo[2,1-a]isoquinoline-1-carboxylate.(known)<sup>8</sup>



**General procedure:** 2-(2-oxo-2-phenylethyl)isoquinolin-2-ium bromide **1j-HBr** (0.84mmol, 275.7mg, 2.8eq.), tetrabutylammonium bromide (0.66mmol, 212.8mg, 2.2eq.), dimethyl 2-methylenesuccinate **2a** (0.3mmol, 47.5mg, 1.0eq.) and *i*-Pr<sub>2</sub>NEt (0.75mmol, 125.0μL, 2.5eq.) were added sequentially to 2.0 mL of dioxane. The reaction mixture was stirred at 45 °C for 40h under argon atmosphere. 96% NMR yield of **4ja** was obtained with 1,3,5-trimethoxy-benzene as internal standard. Then dioxane was removed and the residue was purified by column chromatography (SiO<sub>2</sub>, hexane/EA=0:1, v/v; R<sub>f</sub>=0.5) to afforded **4ja** as yellow solid (117.1mg, yield: 96%, not 100% purity because of slow decomposition on silica gel).

<sup>1</sup>H NMR (400 MHz, Chloroform-*d*): δ 8.04 (d, *J* = 7.1 Hz, 2H), 7.61 (d, *J* = 7.4 Hz, 1H), 7.52 (dd, *J* = 8.2, 6.9 Hz, 2H), 7.14 (td, *J* = 7.5, 1.3 Hz, 1H), 7.02 (td, *J* = 7.5, 1.3 Hz, 1H), 6.99 – 6.90 (m, 1H), 6.86 (dd, *J* = 7.5, 1.3 Hz, 1H), 6.11 (d, *J* = 7.5 Hz, 1H), 5.33 (dd, *J* = 9.4, 5.6 Hz, 1H), 5.17 (d, *J* = 7.6 Hz, 1H), 4.57 (s, 1H), 3.64 (s, 3H), 3.36 (s, 3H), 3.29 (d, *J* = 16.9 Hz, 1H), 3.15 (dd, *J* = 13.4, 9.4 Hz, 1H), 2.56 (d, *J* = 16.9 Hz, 1H), 1.87 (dd, *J* = 13.4, 5.7 Hz, 1H).

<sup>13</sup>C NMR (101 MHz, Chloroform-*d*): δ 197.0, 173.8, 171.6, 137.6, 133.6, 132.5, 128.9, 128.8, 128.5, 126.8, 126.2, 124.9, 124.0, 97.9, 77.2, 68.9, 67.7, 57.3, 52.1, 51.8, 40.1, 34.4, 29.7.

<sup>1</sup>H, <sup>13</sup>C NMR Spectra:





#### 4ja to 3ja:



**General procedure:** methyl 3-benzoyl-1-(2-methoxy-2-oxoethyl)-1,2,3,10b-tetrahydropyrrolo[2,1-a]isoquinoline-1-carboxylate **4ja** (0.3mmol, 121.5mg, 1.0eq.), 2-(2-oxo-2-phenylethyl)isoquinolin-2-ium bromide **1j-HBr** (0.54mmol, 177.2mg, 1.8eq.), tetrabutylammonium bromide (0.66mmol, 212.8mg, 2.2eq.), and *t*-Pr<sub>2</sub>NEt (0.45mmol, 75.0μL, 1.5eq.) were added sequentially to 2.0 mL of dioxane. The reaction mixture was stirred at 45°C for 40h under O<sub>2</sub> atmosphere. Then dioxane was removed and the residue was purified by column chromatography (SiO<sub>2</sub>, hexane/EA=0:1, v/v; R<sub>f</sub>=0.5) to afforded **3ja** as yellow oil (43.2mg, yield: 49%, based on 70% purity of **4ja**).

**Note:** The purity of **4ja** which used above was determined to be 70% by <sup>1</sup>H NMR (1,3,5-trimethoxybenzene as internal standard, reactant/internal standard=0.1/0.2, mol/mol):



#### 5. X-ray Information for 3ja and 4ja

Crystals suitable of **3ja** and **4ja** for X-ray analysis could be successfully grown by slow volatilization in ethyl acetate.





CCDC:2236219



4ja

## checkCIF/PLATON report(3ja)

Structure factors have been supplied for datablock(s) 1

THIS REPORT IS FOR GUIDANCE ONLY. IF USED AS PART OF A REVIEW PROCEDURE FOR PUBLICATION, IT SHOULD NOT REPLACE THE EXPERTISE OF AN EXPERIENCED CRYSTALLOGRAPHIC REFEREE.

No syntax errors found. CIF dictionary Interpreting this report

### Datablock: 1

|                        |                                                      |                                 |
|------------------------|------------------------------------------------------|---------------------------------|
| Bond precision:        | C-C = 0.0025 Å                                       | Wavelength=0.71073              |
| Cell:                  | a=9.4202(7) b=18.5520(13) c=12.6365(9)               |                                 |
|                        | alpha=90 beta=110.294(1) gamma=90                    |                                 |
| Temperature:           | 296 K                                                |                                 |
|                        | Calculated                                           | Reported                        |
| Volume                 | 2071.3(3)                                            | 2071.3(3)                       |
| Space group            | P 21/n                                               | P2(1)/n                         |
| Hall group             | -P 2yn                                               | ?                               |
| Moiety formula         | C24 H21 N O6                                         | ?                               |
| Sum formula            | C24 H21 N O6                                         | C24 H21 N O6                    |
| Mr                     | 419.42                                               | 419.42                          |
| Dx, g cm <sup>-3</sup> | 1.345                                                | 1.345                           |
| Z                      | 4                                                    | 4                               |
| Mu (mm <sup>-1</sup> ) | 0.097                                                | 0.097                           |
| F000                   | 880.0                                                | 880.0                           |
| F000'                  | 880.48                                               |                                 |
| h,k,lmax               | 11,22,15                                             | 11,22,15                        |
| Nref                   | 3644                                                 | 3642                            |
| Tmin,Tmax              | 0.977,0.981                                          | 0.971,0.981                     |
| Tmin'                  | 0.971                                                |                                 |
| Correction method=     | # Reported T Limits: Tmin=0.971 Tmax=0.981 AbsCorr = |                                 |
|                        | MULTI-SCAN                                           |                                 |
| Data completeness=     | 0.999                                                | Theta(max)= 25.000              |
| R(reflections)=        | 0.0371( 2992)                                        | wR2(reflections)= 0.0822( 3642) |
| S = 1.001              | Npar= 283                                            |                                 |

The following ALERTS were generated. Each ALERT has the format

**test-name\_ALERT\_alert-type\_alert-level.**

Click on the hyperlinks for more details of the test.

#### Alert level C

PLAT369\_ALERT\_2\_C Long C(sp<sup>2</sup>)-C(sp<sup>2</sup>) Bond C7 - C8 . 1.53 Ang.

#### Alert level G

PLAT003\_ALERT\_2\_G Number of Uiso or Uij Restrained non-H Atoms ... 2 Report  
 PLAT005\_ALERT\_5\_G No Embedded Refinement Details Found in the CIF Please Do !  
 PLAT066\_ALERT\_1\_G Predicted and Reported Tmin&Tmax Range Identical ? Check

PLAT093 ALERT 1 G No s.u.'s on H-positions, Refinement Reported as mixed Check  
PLAT432 ALERT 2 G Short Inter X...Y Contact O2 ..C22 . 3.00 Ang.  
1/2-x,1/2+y,1/2-z = 2\_555 Check  
PLAT793 ALERT 4 G Model has Chirality at C10 (Centro SPGR) S Verify  
PLAT860 ALERT 3 G Number of Least-Squares Restraints ..... 13 Note  
PLAT899 ALERT 4 G SHELXL97 is Deprecated and Succeeded by SHELXL- 2019/2 Note

---

0 ALERT level A = Most likely a serious problem - resolve or explain  
0 ALERT level B = A potentially serious problem, consider carefully  
1 ALERT level C = Check. Ensure it is not caused by an omission or oversight  
8 ALERT level G = General information/check it is not something unexpected

2 ALERT type 1 CIF construction/syntax error, inconsistent or missing data  
3 ALERT type 2 Indicator that the structure model may be wrong or deficient  
1 ALERT type 3 Indicator that the structure quality may be low  
2 ALERT type 4 Improvement, methodology, query or suggestion  
1 ALERT type 5 Informative message, check

---

It is advisable to attempt to resolve as many as possible of the alerts in all categories. Often the minor alerts point to easily fixed oversights, errors and omissions in your CIF or refinement strategy, so attention to these fine details can be worthwhile. In order to resolve some of the more serious problems it may be necessary to carry out additional measurements or structure refinements. However, the purpose of your study may justify the reported deviations and the more serious of these should normally be commented upon in the discussion or experimental section of a paper or in the "special details" fields of the CIF. checkCIF was carefully designed to identify outliers and unusual parameters, but every test has its limitations and alerts that are not important in a particular case may appear. Conversely, the absence of alerts does not guarantee there are no aspects of the results needing attention. It is up to the individual to critically assess their own results and, if necessary, seek expert advice.

### Publication of your CIF in IUCr journals

A basic structural check has been run on your CIF. These basic checks will be run on all CIFs submitted for publication in IUCr journals (*Acta Crystallographica*, *Journal of Applied Crystallography*, *Journal of Synchrotron Radiation*); however, if you intend to submit to *Acta Crystallographica Section C* or *E* or *IUCrData*, you should make sure that full publication checks are run on the final version of your CIF prior to submission.

### Publication of your CIF in other journals

Please refer to the *Notes for Authors* of the relevant journal for any special instructions relating to CIF submission.

---

**PLATON version of 28/11/2022; check.def file version of 28/11/2022**  
**Datablock 1 - ellipsoid plot**

---



## checkCIF/PLATON report(4ja)

Structure factors have been supplied for datablock(s) 1

THIS REPORT IS FOR GUIDANCE ONLY. IF USED AS PART OF A REVIEW PROCEDURE FOR PUBLICATION, IT SHOULD NOT REPLACE THE EXPERTISE OF AN EXPERIENCED CRYSTALLOGRAPHIC REFEREE.

No syntax errors found.      CIF dictionary      Interpreting this report

### Datablock: 1

|                    |                                                      |                    |
|--------------------|------------------------------------------------------|--------------------|
| Bond precision:    | C-C = 0.0043 Å                                       | Wavelength=0.71073 |
| Cell:              | a=7.713(2)      b=13.434(4)      c=19.831(6)         |                    |
|                    | alpha=90      beta=90      gamma=90                  |                    |
| Temperature: 296 K |                                                      |                    |
|                    | Calculated                                           | Reported           |
| Volume             | 2054.8(10)                                           | 2054.8(10)         |
| Space group        | P n a 21                                             | Pna2(1)            |
| Hall group         | P 2c -2n                                             | ?                  |
| Moiety formula     | C24 H23 N O5                                         | ?                  |
| Sum formula        | C24 H23 N O5                                         | C24 H23 N O5       |
| Mr                 | 405.43                                               | 405.43             |
| Dx,g cm-3          | 1.311                                                | 1.311              |
| Z                  | 4                                                    | 4                  |
| Mu (mm-1)          | 0.092                                                | 0.092              |
| F000               | 856.0                                                | 856.0              |
| F000'              | 856.44                                               |                    |
| h,k,lmax           | 9,16,24                                              | 9,16,24            |
| Nref               | 3867[ 1993]                                          | 3690               |
| Tmin,Tmax          | 0.978,0.982                                          | 0.973,0.982        |
| Tmin'              | 0.973                                                |                    |
| Correction method= | # Reported T Limits: Tmin=0.973 Tmax=0.982 AbsCorr = |                    |
|                    | MULTI-SCAN                                           |                    |
| Data completeness= | 1.85/0.95                                            | Theta(max)= 25.580 |

R(reflections)= 0.0383( 3116)  
S = 1.001

Npar= 273

wR2(reflections)= 0.1291( 3690)

---

The following ALERTS were generated. Each ALERT has the format

**test-name\_ALERT\_alert-type\_alert-level.**

Click on the hyperlinks for more details of the test.

---

#### Alert level C

[STRVA01\\_ALERT\\_4\\_C](#) Flack test results are ambiguous.

From the CIF: `_refine_ls_abs_structure_Flack` 0.600

From the CIF: `_refine_ls_abs_structure_Flack_su` 1.300

[PLAT089\\_ALERT\\_3\\_C](#) Poor Data / Parameter Ratio (Zmax < 18) ..... 7.30 Note

[PLAT242\\_ALERT\\_2\\_C](#) Low 'MainMol' Ueq as Compared to Neighbors of C21 Check

[PLAT340\\_ALERT\\_3\\_C](#) Low Bond Precision on C-C Bonds ..... 0.00435 Ang.

[PLAT907\\_ALERT\\_2\\_C](#) Flack x > 0.5, Structure Needs to be Inverted? . 0.60 Check

---

#### Alert level G

[PLAT005\\_ALERT\\_5\\_G](#) No Embedded Refinement Details Found in the CIF Please Do !

[PLAT032\\_ALERT\\_4\\_G](#) Std. Uncertainty on Flack Parameter Value High . 1.300 Report

[PLAT066\\_ALERT\\_1\\_G](#) Predicted and Reported Tmin&Tmax Range Identical ? Check

[PLAT093\\_ALERT\\_1\\_G](#) No s.u.'s on H-positions, Refinement Reported as mixed Check

[PLAT792\\_ALERT\\_1\\_G](#) Model has Chirality at C8 (Polar SPGR) S Verify

#### And 2 other PLAT792 Alerts

More ...

[PLAT899\\_ALERT\\_4\\_G](#) SHELXL97 is Deprecated and Succeeded by SHELXL- 2019/2 Note

---

0 **ALERT level A** = Most likely a serious problem - resolve or explain

0 **ALERT level B** = A potentially serious problem, consider carefully

5 **ALERT level C** = Check. Ensure it is not caused by an omission or oversight

8 **ALERT level G** = General information/check it is not something unexpected

5 ALERT type 1 CIF construction/syntax error, inconsistent or missing data

2 ALERT type 2 Indicator that the structure model may be wrong or deficient

2 ALERT type 3 Indicator that the structure quality may be low

3 ALERT type 4 Improvement, methodology, query or suggestion

1 ALERT type 5 Informative message, check

---

It is advisable to attempt to resolve as many as possible of the alerts in all categories. Often the minor alerts point to easily fixed oversights, errors and omissions in your CIF or refinement strategy, so attention to these fine details can be worthwhile. In order to resolve some of the more serious problems it may be necessary to carry out additional measurements or structure refinements. However, the purpose of your study may justify the reported deviations and the more serious of these should normally be commented upon in the discussion or experimental section of a paper or in the "special details" fields of the CIF. checkCIF was carefully designed to identify outliers and unusual parameters, but every test has its limitations and alerts that are not important in a particular case may appear. Conversely, the absence of alerts does not guarantee there are no aspects of the results needing attention. It is up to the individual to critically assess their own results and, if necessary, seek expert advice.

#### Publication of your CIF in IUCr journals

A basic structural check has been run on your CIF. These basic checks will be run on all CIFs submitted for publication in IUCr journals (*Acta Crystallographica*, *Journal of Applied Crystallography*, *Journal of Synchrotron Radiation*); however, if you intend to submit to *Acta Crystallographica Section C* or *E* or *IUCrData*, you should make sure that [full publication checks](#) are

run on the final version of your CIF prior to submission.

### Publication of your CIF in other journals

Please refer to the *Notes for Authors* of the relevant journal for any special instructions relating to CIF submission.

---

PLATON version of 28/11/2022; check.def file version of 28/11/2022

Datablock 1 - ellipsoid plot

---



## 6. Reference

- 1 M. M. Vieira, B. T. Dalberto, F. L. Coelho, P. H. Schneider, *Ultrason. Sonochem.* 2020, **68**, 105228.
- 2 I. P. Mosiagin, O. A. Tomashenko, D. V. Spiridonova, M. S. Novikov, S. P. Tunik, A. F. Khlebnikov, *Beilstein. J. Org. Chem.* 2021, **17**, 1490-1498.
- 3 E. Georgescu, F. Georgescu, C. Draghici, P. Filip, F. Dumitrascu, *Revista de Chimie.* 2008, **59**, 269-272.
- 4 O. Tsuge, S. Kanemasa, S. Takenaka, *B. Chem. Soc. Jpn.* 1985, **58**, 3137-57.
- 5 L. H. Sternbach, S. Kaiser, *J. Am. Chem. Soc.* 1952, **74**, 2215-18.
- 6 D. Y. Lee, S. E. Chae, E. M. Jung, E. H. Yang, Y. J. Choi, C.-W. Chung, J. H. Shin, Y. K. Kim, H. J. Kwon, J. H. Ryu, *World Intellectual Property Organization*, WO2018212534 A1 2018-11-22.
- 7 D. S. Allgäuer, P. Mayer, H. Mayr, *J. Am. Chem. Soc.* 2013, **135**(40), 15216-15224.
- 8 R. B. Hu, S. Sun, Y. Su, *Angew. Chem. Int. Ed.* 2017, **56**, 10877-10880.
